# Supplementary material for: Abundant Small Genetic Alterations after Upland Cotton Domestication
Source: Hindawi journal article supplement (doi:10.1155/2018/9254302), 2018-12-18
Supplement: f2 [file 9254302.f2.pdf]

TABLE S2: Frameshift and terminator changes derived by InDel mutations between the cultivated and wild cottons

| Category    | Gene        | Exon | InDel variation<br>cultivated/wild |
|-------------|-------------|------|------------------------------------|
| Frame shift | Gh_A01G0035 | 11   | 1076_1077insACTCGATTCA             |
| Frame shift | Gh_A01G0110 | 1    | 265delC                            |
| Frame shift | Gh_A01G0111 | 5    | 1231_1232insAA                     |
| Frame shift | Gh_A01G0136 | 1    | 13delT                             |
| Frame shift | Gh_A01G0153 | 4    | 379_380insA                        |
| Frame shift | Gh_A01G0175 | 1    | 1_2insA                            |
| Frame shift | Gh_A01G0285 | 4    | 1803delA                           |
| Frame shift | Gh_A01G0286 | 13   | 1837_1840del                       |
| Frame shift | Gh_A01G0307 | 2    | 304_305del                         |
| Frame shift | Gh_A01G0315 | 4    | 2495delA                           |
| Frame shift | Gh_A01G0545 | 4    | 992_993insTTGC                     |
| Frame shift | Gh_A01G0687 | 3    | 1259_1260del                       |
| Frame shift | Gh_A01G0695 | 1    | 9_10insAT                          |
| Frame shift | Gh_A01G0840 | 4    | 539_540insA                        |
| Frame shift | Gh_A01G0840 | 5    | 748_775del                         |
| Frame shift | Gh_A01G0846 | 1    | 781_782insA                        |
| Frame shift | Gh_A01G0915 | 1    | 56delT                             |
| Frame shift | Gh_A01G0948 | 6    | 912_913insT                        |
| Frame shift | Gh_A01G1027 | 8    | 1105delG                           |
| Frame shift | Gh_A01G1027 | 8    | 1162_1163insA                      |
| Frame shift | Gh_A01G1073 | 1    | 853_854insA                        |
| Frame shift | Gh_A01G1268 | 9    | 1767delT                           |
| Frame shift | Gh_A01G1337 | 4    | 347_348insC                        |
| Frame shift | Gh_A01G1363 | 1    | 116delC                            |
| Frame shift | Gh_A01G1492 | 2    | 89delT                             |
| Frame shift | Gh_A01G1625 | 3    | 390_391insT                        |
| Frame shift | Gh_A01G1741 | 2    | 309_310insG                        |
| Frame shift | Gh_A01G1849 | 3    | 354_357del                         |
| Frame shift | Gh_A01G1867 | 10   | 1356_1368del                       |
| Frame shift | Gh_A01G1872 | 3    | 613delA                            |
| Frame shift | Gh_A01G1957 | 1    | 2566_2567insC                      |
| Frame shift | Gh_A01G1982 | 1    | 138delC                            |
| Frame shift | Gh_A01G1992 | 12   | 1461delG                           |
| Frame shift | Gh_A01G2026 | 2    | 285_286insACCGAAACAACA             |
| Frame shift | Gh_A01G2107 | 1    | 164delA                            |
| Frame shift | Gh_A01G2112 | 1    | 684delC                            |
| Frame shift | Gh_A01G2121 | 14   | 1886delA                           |
| Frame shift | Gh_A02G0008 | 1    | 96_97insTTTACCCGATGCCACC           |
| Frame shift | Gh_A02G0046 | 1    | 1293_1294insA                      |
| Frame shift | Gh_A02G0103 | 13   | 4703delA                           |
| Frame shift | Gh_A02G0105 | 1    | 709_751del                         |
| Frame shift | Gh_A02G0107 | 1    | 1217delA                           |
| Frame shift | Gh_A02G0107 | 2    | 1286delT                           |
| Frame shift | Gh_A02G0114 | 2    | 1383_1384insGAGAGAGAGA             |

|             |             |            |                 |
|-------------|-------------|------------|-----------------|
| Frame shift | Gh_A02G0120 | 2          | 906delG         |
| Frame shift | Gh_A02G0128 | 3          | 1225_1226insT   |
| Frame shift | Gh_A02G0153 | 1          | 1_2insAA        |
| Frame shift | Gh_A02G0173 | 2          | 228_249del      |
| Frame shift | Gh_A02G0179 | 5          | 627_666del      |
| Frame shift | Gh_A02G0186 | 23         | 3613_3614insT   |
| Frame shift | Gh_A02G0248 | Whole gene |                 |
| Frame shift | Gh_A02G0249 | 2          | 240delT         |
| Frame shift | Gh_A02G0250 | 1          | 180_181del      |
| Frame shift | Gh_A02G0250 | 1          | 246delC         |
| Frame shift | Gh_A02G0262 | 2          | 311delT         |
| Frame shift | Gh_A02G0421 | 1          | 41delT          |
| Frame shift | Gh_A02G0431 | 1          | 1129delG        |
| Frame shift | Gh_A02G0431 | 1          | 1795delG        |
| Frame shift | Gh_A02G0504 | 2          | 335_336insAT    |
| Frame shift | Gh_A02G0607 | 2          | 593_594insA     |
| Frame shift | Gh_A02G0615 | 2          | 123delT         |
| Frame shift | Gh_A02G0616 | 4          | 1249_1250del    |
| Frame shift | Gh_A02G0761 | 15         | 1083delT        |
| Frame shift | Gh_A02G0855 | 1          | 119_120insGAGG  |
| Frame shift | Gh_A02G0913 | 5          | 635delT         |
| Frame shift | Gh_A02G0916 | 1          | 487delT         |
| Frame shift | Gh_A02G0917 | 3          | 466_500del      |
| Frame shift | Gh_A02G0923 | 2          | 358_359del      |
| Frame shift | Gh_A02G0963 | 4          | 503_504insGTTGG |
| Frame shift | Gh_A02G1258 | 1          | 105_106insG     |
| Frame shift | Gh_A02G1301 | 2          | 292_293del      |
| Frame shift | Gh_A02G1319 | 1          | 125_128del      |
| Frame shift | Gh_A02G1321 | 7          | 925_926insG     |
| Frame shift | Gh_A02G1402 | 8          | 1996delA        |
| Frame shift | Gh_A02G1434 | 2          | 247_248insCTATG |
| Frame shift | Gh_A02G1489 | 3          | 1305_1306insT   |
| Frame shift | Gh_A02G1535 | 1          | 105_106insT     |
| Frame shift | Gh_A02G1552 | 1          | 493_494insG     |
| Frame shift | Gh_A02G1608 | 18         | 1268_1269insTT  |
| Frame shift | Gh_A02G1724 | 4          | 349delC         |
| Frame shift | Gh_A02G1738 | 1          | 6delG           |
| Frame shift | Gh_A03G0048 | 6          | 1396delT        |
| Frame shift | Gh_A03G0055 | 9          | 915_921del      |
| Frame shift | Gh_A03G0062 | 1          | 229_230insA     |
| Frame shift | Gh_A03G0076 | 2          | 645delT         |
| Frame shift | Gh_A03G0076 | 2          | 740delA         |
| Frame shift | Gh_A03G0090 | 1          | 71delC          |
| Frame shift | Gh_A03G0164 | 3          | 447_448insG     |
| Frame shift | Gh_A03G0200 | 4          | 427delA         |
| Frame shift | Gh_A03G0307 | 1          | 48delA          |
| Frame shift | Gh_A03G0339 | 1          | 59_60insCC      |
| Frame shift | Gh_A03G0340 | 1          | 1_2insA         |
| Frame shift | Gh_A03G0362 | 3          | 207_208insAT    |

|             |             |    |                                         |
|-------------|-------------|----|-----------------------------------------|
| Frame shift | Gh_A03G0438 | 4  | 642delG                                 |
| Frame shift | Gh_A03G0450 | 1  | 1067_1068insA                           |
| Frame shift | Gh_A03G0510 | 3  | 1043_1044insA                           |
| Frame shift | Gh_A03G0530 | 5  | 645_646insT                             |
| Frame shift | Gh_A03G0532 | 5  | 541_542insT                             |
| Frame shift | Gh_A03G0601 | 7  | 1719_1722del                            |
| Frame shift | Gh_A03G0611 | 16 | 2263_2264insA                           |
| Frame shift | Gh_A03G0635 | 1  | 896_897insT                             |
| Frame shift | Gh_A03G0673 | 2  | 420_421insTACTTTCTCCGACAAAGCAATATCAATCG |
| Frame shift | Gh_A03G0688 | 2  | 169delG                                 |
| Frame shift | Gh_A03G0692 | 2  | 134delA                                 |
| Frame shift | Gh_A03G0697 | 3  | 1846_1847insC                           |
| Frame shift | Gh_A03G0737 | 8  | 1637_1638insA                           |
| Frame shift | Gh_A03G0765 | 4  | 622_623insC                             |
| Frame shift | Gh_A03G0792 | 8  | 981_982del                              |
| Frame shift | Gh_A03G0800 | 1  | 263_291del                              |
| Frame shift | Gh_A03G0802 | 1  | 5delA                                   |
| Frame shift | Gh_A03G0813 | 9  | 1557delT                                |
| Frame shift | Gh_A03G0862 | 10 | 1214_1215insCTTT                        |
| Frame shift | Gh_A03G0875 | 2  | 1502_1514del                            |
| Frame shift | Gh_A03G0885 | 2  | 186delT                                 |
| Frame shift | Gh_A03G0898 | 1  | 28delA                                  |
| Frame shift | Gh_A03G0988 | 1  | 231_232insA                             |
| Frame shift | Gh_A03G1051 | 3  | 136_137del                              |
| Frame shift | Gh_A03G1056 | 2  | 109delA                                 |
| Frame shift | Gh_A03G1073 | 1  | 454delC                                 |
| Frame shift | Gh_A03G1176 | 1  | 93delC                                  |
| Frame shift | Gh_A03G1180 | 1  | 406_407insG                             |
| Frame shift | Gh_A03G1229 | 3  | 277_278insT                             |
| Frame shift | Gh_A03G1250 | 3  | 535_536insCA                            |
| Frame shift | Gh_A03G1259 | 3  | 593delG                                 |
| Frame shift | Gh_A03G1272 | 3  | 1763_1764insT                           |
| Frame shift | Gh_A03G1278 | 1  | 148_149insA                             |
| Frame shift | Gh_A03G1298 | 1  | 78_79insC                               |
| Frame shift | Gh_A03G1327 | 1  | 108delT                                 |
| Frame shift | Gh_A03G1363 | 1  | 703delG                                 |
| Frame shift | Gh_A03G1410 | 1  | 293_294del                              |
| Frame shift | Gh_A03G1420 | 2  | 471delG                                 |
| Frame shift | Gh_A03G1438 | 6  | 1668_1669insTTTTTGTTCC                  |
| Frame shift | Gh_A03G1581 | 2  | 228_229insT                             |
| Frame shift | Gh_A03G1581 | 5  | 445_452del                              |
| Frame shift | Gh_A03G1635 | 1  | 1352_1353insCG                          |
| Frame shift | Gh_A03G1788 | 1  | 11_12insA                               |
| Frame shift | Gh_A03G1829 | 1  | 1096_1099del                            |
| Frame shift | Gh_A03G1833 | 1  | 67_68insCC                              |
| Frame shift | Gh_A03G1839 | 1  | 254delT                                 |
| Frame shift | Gh_A03G1875 | 1  | 91delG                                  |
| Frame shift | Gh_A03G1938 | 5  | 329_330insGC                            |

|             |             |    |                       |
|-------------|-------------|----|-----------------------|
| Frame shift | Gh_A03G1962 | 3  | 1355_1356insT         |
| Frame shift | Gh_A03G1994 | 3  | 1092_1093insG         |
| Frame shift | Gh_A03G1995 | 2  | 964_977del            |
| Frame shift | Gh_A03G2010 | 8  | 1192_1193del          |
| Frame shift | Gh_A03G2011 | 1  | 243_244insT           |
| Frame shift | Gh_A03G2045 | 2  | 137_138insA           |
| Frame shift | Gh_A03G2081 | 14 | 1464_1465del          |
| Frame shift | Gh_A03G2104 | 6  | 1862_1863insAT        |
| Frame shift | Gh_A03G2132 | 5  | 630delT               |
| Frame shift | Gh_A04G0056 | 1  | 71_72insTT            |
| Frame shift | Gh_A04G0075 | 1  | 92delT                |
| Frame shift | Gh_A04G0096 | 1  | 145delC               |
| Frame shift | Gh_A04G0133 | 3  | 368delT               |
| Frame shift | Gh_A04G0167 | 1  | 38_39insA             |
| Frame shift | Gh_A04G0183 | 4  | 941_942insAA          |
| Frame shift | Gh_A04G0187 | 1  | 1653_1662del          |
| Frame shift | Gh_A04G0189 | 2  | 44_45insT             |
| Frame shift | Gh_A04G0217 | 15 | 1307_1308insT         |
| Frame shift | Gh_A04G0224 | 1  | 220_221insTG          |
| Frame shift | Gh_A04G0229 | 1  | 31_56del              |
| Frame shift | Gh_A04G0269 | 3  | 1099_1109del          |
| Frame shift | Gh_A04G0272 | 2  | 1083_1084insA         |
| Frame shift | Gh_A04G0297 | 3  | 1096_1097insT         |
| Frame shift | Gh_A04G0566 | 9  | 1119delC              |
| Frame shift | Gh_A04G0589 | 7  | 2226_2227insT         |
| Frame shift | Gh_A04G0589 | 7  | 2123_2124insAA        |
| Frame shift | Gh_A04G0708 | 3  | 258delG               |
| Frame shift | Gh_A04G0849 | 3  | 262_263insTT          |
| Frame shift | Gh_A04G0885 | 1  | 201_202insA           |
| Frame shift | Gh_A04G0975 | 5  | 680_681insC           |
| Frame shift | Gh_A04G1007 | 1  | 1delA                 |
| Frame shift | Gh_A04G1011 | 4  | 298delG               |
| Frame shift | Gh_A04G1081 | 1  | 640_643del            |
| Frame shift | Gh_A04G1215 | 1  | 56_93del              |
| Frame shift | Gh_A04G1283 | 1  | 165delG               |
| Frame shift | Gh_A04G1290 | 2  | 445delT               |
| Frame shift | Gh_A05G0017 | 11 | 897_898insG           |
| Frame shift | Gh_A05G0080 | 4  | 750_751insGGCCAAAAGGT |
| Frame shift | Gh_A05G0080 | 5  | 827_828del            |
| Frame shift | Gh_A05G0188 | 1  | 83_84insC             |
| Frame shift | Gh_A05G0230 | 2  | 1309_1310insCA        |
| Frame shift | Gh_A05G0230 | 2  | 1356_1357insT         |
| Frame shift | Gh_A05G0230 | 2  | 1521_1524del          |
| Frame shift | Gh_A05G0408 | 2  | 344delA               |
| Frame shift | Gh_A05G0474 | 3  | 123_124insTCTAACT     |
| Frame shift | Gh_A05G0514 | 9  | 1023delA              |
| Frame shift | Gh_A05G0527 | 3  | 4975_4997del          |
| Frame shift | Gh_A05G0661 | 3  | 459delT               |

|             |             |    |                         |
|-------------|-------------|----|-------------------------|
| Frame shift | Gh_A05G0666 | 8  | 914_915insT             |
| Frame shift | Gh_A05G0682 | 1  | 436_437insTA            |
| Frame shift | Gh_A05G0714 | 1  | 406delA                 |
| Frame shift | Gh_A05G0776 | 1  | 118_119insC             |
| Frame shift | Gh_A05G0927 | 2  | 120delC                 |
| Frame shift | Gh_A05G1096 | 2  | 524_525insC             |
| Frame shift | Gh_A05G1097 | 1  | 82_83insC               |
| Frame shift | Gh_A05G1118 | 12 | 1247_1250del            |
| Frame shift | Gh_A05G1118 | 17 | 1927_1928insA           |
| Frame shift | Gh_A05G1306 | 3  | 431_432insAT            |
| Frame shift | Gh_A05G1314 | 3  | 623delA                 |
| Frame shift | Gh_A05G1324 | 1  | 385delC                 |
| Frame shift | Gh_A05G1379 | 2  | 609_610insA             |
| Frame shift | Gh_A05G1400 | 2  | 333_334insG             |
| Frame shift | Gh_A05G1403 | 11 | 1266_1266del            |
| Frame shift | Gh_A05G1560 | 1  | 519delA                 |
| Frame shift | Gh_A05G1681 | 1  | 347_348insG             |
| Frame shift | Gh_A05G1769 | 1  | 461_462insA             |
| Frame shift | Gh_A05G1899 | 3  | 322_323insG             |
| Frame shift | Gh_A05G1943 | 3  | 597_598del              |
| Frame shift | Gh_A05G2018 | 19 | 5378_5379insC           |
| Frame shift | Gh_A05G2037 | 2  | 371delA                 |
| Frame shift | Gh_A05G2061 | 1  | 174_175insC             |
| Frame shift | Gh_A05G2097 | 1  | 23_24insT               |
| Frame shift | Gh_A05G2102 | 4  | 1058delC                |
| Frame shift | Gh_A05G2149 | 3  | 66_67insC               |
| Frame shift | Gh_A05G2210 | 1  | 219_220insG             |
| Frame shift | Gh_A05G2493 | 6  | 2878_2879insA           |
| Frame shift | Gh_A05G2558 | 2  | 117_118insATATTTTTTCAGG |
| Frame shift | Gh_A05G2582 | 2  | 511_512insA             |
| Frame shift | Gh_A05G2584 | 3  | 635_641del              |
| Frame shift | Gh_A05G2776 | 4  | 807_808insGT            |
| Frame shift | Gh_A05G2850 | 1  | 226_227del              |
| Frame shift | Gh_A05G2850 | 3  | 904_905insG             |
| Frame shift | Gh_A05G2896 | 7  | 1125delT                |
| Frame shift | Gh_A05G2903 | 3  | 306delT                 |
| Frame shift | Gh_A05G3113 | 5  | 823_824del              |
| Frame shift | Gh_A05G3154 | 2  | 542delG                 |
| Frame shift | Gh_A05G3211 | 2  | 783_784insTTCTA         |
| Frame shift | Gh_A05G3263 | 2  | 424delT                 |
| Frame shift | Gh_A05G3343 | 1  | 769delC                 |
| Frame shift | Gh_A05G3343 | 1  | 798_801del              |
| Frame shift | Gh_A05G3343 | 1  | 2174_2175insA           |
| Frame shift | Gh_A05G3504 | 5  | 459delG                 |
| Frame shift | Gh_A05G3562 | 4  | 453delA                 |
| Frame shift | Gh_A05G3578 | 2  | 11delA                  |
| Frame shift | Gh_A05G3623 | 1  | 212_227del              |
| Frame shift | Gh_A05G3885 | 2  | 232_236del              |

|             |             |            |                       |
|-------------|-------------|------------|-----------------------|
| Frame shift | Gh_A05G3969 | 1          | 1013_1014insTGAGATG   |
| Frame shift | Gh_A06G0006 | 2          | 26_27insG             |
| Frame shift | Gh_A06G0117 | 1          | 940delC               |
| Frame shift | Gh_A06G0119 | 2          | 1383delC              |
| Frame shift | Gh_A06G0138 | 6          | 925delA               |
| Frame shift | Gh_A06G0138 | 6          | 684_685del            |
| Frame shift | Gh_A06G0148 | 6          | 762_763insA           |
| Frame shift | Gh_A06G0152 | 1          | 234_235insAAAAACCTTGT |
| Frame shift | Gh_A06G0174 | 2          | 154_155insT           |
| Frame shift | Gh_A06G0194 | 2          | 380delC               |
| Frame shift | Gh_A06G0207 | 1          | 274delG               |
| Frame shift | Gh_A06G0272 | 11         | 1083delT              |
| Frame shift | Gh_A06G0275 | 1          | 930delT               |
| Frame shift | Gh_A06G0275 | 1          | 1043_1058del          |
| Frame shift | Gh_A06G0292 | 3          | 2432delT              |
| Frame shift | Gh_A06G0293 | 1          | 709delG               |
| Frame shift | Gh_A06G0348 | 3          | 610_611insA           |
| Frame shift | Gh_A06G0433 | 9          | 1582_1583insAG        |
| Frame shift | Gh_A06G0438 | 1          | 263delA               |
| Frame shift | Gh_A06G0505 | 4          | 881delG               |
| Frame shift | Gh_A06G0539 | 3          | 1366delT              |
| Frame shift | Gh_A06G0623 | 15         | 1328_1329insA         |
| Frame shift | Gh_A06G0638 | 14         | 1821_1822del          |
| Frame shift | Gh_A06G0639 | 1          | 466delC               |
| Frame shift | Gh_A06G0646 | 3          | 431_432insGGTTTGT     |
| Frame shift | Gh_A06G0671 | 4          | 792_793del            |
| Frame shift | Gh_A06G0676 | 1          | 1_2insAA              |
| Frame shift | Gh_A06G0690 | 4          | 396_397insG           |
| Frame shift | Gh_A06G0704 | 5          | 825_829del            |
| Frame shift | Gh_A06G0708 | 3          | 504_505insA           |
| Frame shift | Gh_A06G0728 | 1          | 494_495del            |
| Frame shift | Gh_A06G0845 | 3          | 535_536insC           |
| Frame shift | Gh_A06G0874 | 9          | 1803_1803del          |
| Frame shift | Gh_A06G0897 | 2          | 273_274insT           |
| Frame shift | Gh_A06G0922 | 6          | 1162_1163del          |
| Frame shift | Gh_A06G0991 | 24         | 2907_2908insG         |
| Frame shift | Gh_A06G1001 | 8          | 1021_1022insC         |
| Frame shift | Gh_A06G1065 | 3          | 701_702del            |
| Frame shift | Gh_A06G1066 | 3          | 831delA               |
| Frame shift | Gh_A06G1098 | 1          | 613_628del            |
| Frame shift | Gh_A06G1118 | Whole gene |                       |
| Frame shift | Gh_A06G1121 | 7          | 2747_2748insC         |
| Frame shift | Gh_A06G1134 | 1          | 321_325del            |
| Frame shift | Gh_A06G1142 | 1          | 1455_1456insG         |
| Frame shift | Gh_A06G1192 | 3          | 354_355insA           |
| Frame shift | Gh_A06G1210 | 3          | 98_99insT             |
| Frame shift | Gh_A06G1337 | 1          | 652_653insT           |
| Frame shift | Gh_A06G1494 | 3          | 139_140insG           |

|             |             |            |                           |
|-------------|-------------|------------|---------------------------|
| Frame shift | Gh_A06G1526 | 1          | 136delA                   |
| Frame shift | Gh_A06G1533 | 2          | 1497delG                  |
| Frame shift | Gh_A06G1552 | 18         | 1252_1253del              |
| Frame shift | Gh_A06G1558 | 1          | 1356delA                  |
| Frame shift | Gh_A06G1592 | 1          | 214delG                   |
| Frame shift | Gh_A06G1595 | 8          | 735delC                   |
| Frame shift | Gh_A06G1619 | 1          | 21delA                    |
| Frame shift | Gh_A06G1637 | 2          | 178delT                   |
| Frame shift | Gh_A06G1649 | 4          | 1369delA                  |
| Frame shift | Gh_A06G1651 | 1          | 665_666insTCAAGAT         |
| Frame shift | Gh_A06G1670 | 1          | 238delA                   |
| Frame shift | Gh_A06G1681 | 2          | 239_240insG               |
| Frame shift | Gh_A06G1691 | 2          | 276_277insGCACCATTCACGATC |
| Frame shift | Gh_A06G1692 | 4          | 523delA                   |
| Frame shift | Gh_A06G1693 | 12         | 1038_1039insGAGT          |
| Frame shift | Gh_A06G1701 | 3          | 734delA                   |
| Frame shift | Gh_A06G1753 | 2          | 195delA                   |
| Frame shift | Gh_A06G1762 | 1          | 80_81del                  |
| Frame shift | Gh_A06G1803 | 5          | 1579_1580del              |
| Frame shift | Gh_A06G1915 | 7          | 513_516del                |
| Frame shift | Gh_A06G1919 | 1          | 680_681insA               |
| Frame shift | Gh_A06G1919 | 1          | 635delC                   |
| Frame shift | Gh_A06G1951 | Whole gene |                           |
| Frame shift | Gh_A06G2001 | 1          | 889_895del                |
| Frame shift | Gh_A06G2029 | 2          | 26delA                    |
| Frame shift | Gh_A06G2036 | 6          | 1125delT                  |
| Frame shift | Gh_A06G2043 | 1          | 63_64insT                 |
| Frame shift | Gh_A06G2055 | 1          | 76_77insGGTGTGGCTTTCGAGA  |
| Frame shift | Gh_A06G2055 | 1          | 1462_1463insG             |
| Frame shift | Gh_A07G0001 | 2          | 108delA                   |
| Frame shift | Gh_A07G0030 | 1          | 650_651insG               |
| Frame shift | Gh_A07G0111 | 4          | 1281delA                  |
| Frame shift | Gh_A07G0192 | 1          | 73_89del                  |
| Frame shift | Gh_A07G0193 | 6          | 1576delG                  |
| Frame shift | Gh_A07G0201 | 1          | 433_434insG               |
| Frame shift | Gh_A07G0211 | 2          | 224_225insTTGGAAA         |
| Frame shift | Gh_A07G0359 | 12         | 2259delA                  |
| Frame shift | Gh_A07G0411 | 1          | 159_160insG               |
| Frame shift | Gh_A07G0433 | 1          | 342_343insT               |
| Frame shift | Gh_A07G0451 | 1          | 825_826insC               |
| Frame shift | Gh_A07G0479 | 1          | 293delC                   |
| Frame shift | Gh_A07G0518 | 1          | 1605_1606insA             |
| Frame shift | Gh_A07G0527 | 1          | 901_919del                |
| Frame shift | Gh_A07G0528 | 2          | 361delG                   |
| Frame shift | Gh_A07G0575 | 6          | 777_784del                |
| Frame shift | Gh_A07G0593 | 7          | 552_553del                |
| Frame shift | Gh_A07G0600 | 2          | 76_77insC                 |
| Frame shift | Gh_A07G0602 | 1          | 452delT                   |

|             |             |            |                     |
|-------------|-------------|------------|---------------------|
| Frame shift | Gh_A07G0632 | 3          | 894delG             |
| Frame shift | Gh_A07G0632 | 5          | 1636_1637insA       |
| Frame shift | Gh_A07G0657 | 1          | 40delG              |
| Frame shift | Gh_A07G0666 | 1          | 110_111insA         |
| Frame shift | Gh_A07G0693 | 2          | 1083_1084insC       |
| Frame shift | Gh_A07G0720 | 5          | 419_420insC         |
| Frame shift | Gh_A07G0823 | 2          | 70_73del            |
| Frame shift | Gh_A07G0837 | 2          | 373_374insT         |
| Frame shift | Gh_A07G0839 | Whole gene |                     |
| Frame shift | Gh_A07G1006 | 5          | 989_990del          |
| Frame shift | Gh_A07G1055 | 5          | 1115_1116insC       |
| Frame shift | Gh_A07G1278 | 1          | 87_88del            |
| Frame shift | Gh_A07G1292 | 4          | 306_307insA         |
| Frame shift | Gh_A07G1306 | 2          | 122delG             |
| Frame shift | Gh_A07G1322 | 3          | 900_901del          |
| Frame shift | Gh_A07G1341 | 1          | 351_352insG         |
| Frame shift | Gh_A07G1373 | 1          | 13_14insA           |
| Frame shift | Gh_A07G1396 | 1          | 641delG             |
| Frame shift | Gh_A07G1400 | 2          | 1285_1286del        |
| Frame shift | Gh_A07G1401 | 1          | 226delA             |
| Frame shift | Gh_A07G1405 | 1          | 289_308del          |
| Frame shift | Gh_A07G1410 | 1          | 140_141insT         |
| Frame shift | Gh_A07G1437 | 2          | 174_175insG         |
| Frame shift | Gh_A07G1503 | 4          | 898_899insA         |
| Frame shift | Gh_A07G1506 | 1          | 633_634del          |
| Frame shift | Gh_A07G1526 | 2          | 1028delT            |
| Frame shift | Gh_A07G1539 | 1          | 121delT             |
| Frame shift | Gh_A07G1552 | Whole gene |                     |
| Frame shift | Gh_A07G1558 | 1          | 17_18insTTTCCATAAG  |
| Frame shift | Gh_A07G1572 | 1          | 1200_1201del        |
| Frame shift | Gh_A07G1619 | 12         | 1663_1664insGT      |
| Frame shift | Gh_A07G1622 | 1          | 143_146del          |
| Frame shift | Gh_A07G1630 | 1          | 402delG             |
| Frame shift | Gh_A07G1647 | 1          | 1431_1437del        |
| Frame shift | Gh_A07G1662 | 1          | 1048_1051del        |
| Frame shift | Gh_A07G1733 | 2          | 523_524insG         |
| Frame shift | Gh_A07G1778 | 1          | 20_21insG           |
| Frame shift | Gh_A07G1783 | 9          | 1974delA            |
| Frame shift | Gh_A07G1806 | 4          | 179_183del          |
| Frame shift | Gh_A07G1808 | 1          | 1_2insA             |
| Frame shift | Gh_A07G1959 | 7          | 1413delT            |
| Frame shift | Gh_A07G2017 | 2          | 1009_1010insG       |
| Frame shift | Gh_A07G2139 | 2          | 441delA             |
| Frame shift | Gh_A07G2163 | 1          | 266delA             |
| Frame shift | Gh_A07G2194 | 3          | 254_255insT         |
| Frame shift | Gh_A07G2238 | 3          | 1208_1209insTGAG    |
| Frame shift | Gh_A07G2285 | 5          | 1050_1051insAACTTTC |
| Frame shift | Gh_A07G2293 | 1          | 1_2insA             |



|             |             |    |                                  |
|-------------|-------------|----|----------------------------------|
| Frame shift | Gh_A07G2308 | 1  | 10_11del                         |
| Frame shift | Gh_A07G2332 | 1  | 11_12del                         |
| Frame shift | Gh_A07G2345 | 7  | 618delT                          |
| Frame shift | Gh_A08G0028 | 1  | 233_234del                       |
| Frame shift | Gh_A08G0032 | 3  | 2259_2260insTTAGTTGTGCAACAACAACA |
| Frame shift | Gh_A08G0042 | 4  | 619_620insA                      |
| Frame shift | Gh_A08G0044 | 10 | 1475_1476insA                    |
| Frame shift | Gh_A08G0047 | 1  | 762delC                          |
| Frame shift | Gh_A08G0068 | 1  | 151_152insT                      |
| Frame shift | Gh_A08G0096 | 1  | 1347_1348insT                    |
| Frame shift | Gh_A08G0099 | 2  | 486_487insG                      |
| Frame shift | Gh_A08G0119 | 1  | 59delC                           |
| Frame shift | Gh_A08G0140 | 2  | 96delT                           |
| Frame shift | Gh_A08G0185 | 3  | 2576delA                         |
| Frame shift | Gh_A08G0185 | 4  | 3551_3552insC                    |
| Frame shift | Gh_A08G0233 | 1  | 521_522insAT                     |
| Frame shift | Gh_A08G0393 | 2  | 1673_1674insC                    |
| Frame shift | Gh_A08G0436 | 2  | 43delG                           |
| Frame shift | Gh_A08G0492 | 1  | 8_9insGG                         |
| Frame shift | Gh_A08G0553 | 1  | 43delC                           |
| Frame shift | Gh_A08G0644 | 3  | 326delT                          |
| Frame shift | Gh_A08G0650 | 1  | 5_6insAT                         |
| Frame shift | Gh_A08G0865 | 1  | 209delA                          |
| Frame shift | Gh_A08G0949 | 1  | 219delC                          |
| Frame shift | Gh_A08G1538 | 3  | 342_343insG                      |
| Frame shift | Gh_A08G1637 | 1  | 25_28del                         |
| Frame shift | Gh_A08G1640 | 9  | 1318_1319insTA                   |
| Frame shift | Gh_A08G1649 | 2  | 973_991del                       |
| Frame shift | Gh_A08G1745 | 2  | 254_255insG                      |
| Frame shift | Gh_A08G1810 | 1  | 482delG                          |
| Frame shift | Gh_A08G1824 | 1  | 52_53insTCCTTAA                  |
| Frame shift | Gh_A08G1881 | 1  | 801delT                          |
| Frame shift | Gh_A08G1885 | 1  | 28delC                           |
| Frame shift | Gh_A08G1886 | 1  | 1000_1003del                     |
| Frame shift | Gh_A08G1899 | 1  | 42_45del                         |
| Frame shift | Gh_A08G2009 | 3  | 429delC                          |
| Frame shift | Gh_A08G2048 | 1  | 14_15del                         |
| Frame shift | Gh_A08G2128 | 4  | 407_408insG                      |
| Frame shift | Gh_A08G2143 | 2  | 252_259del                       |
| Frame shift | Gh_A08G2252 | 5  | 1721_1722del                     |
| Frame shift | Gh_A08G2331 | 1  | 238_241del                       |
| Frame shift | Gh_A09G0108 | 1  | 294_295insC                      |
| Frame shift | Gh_A09G0177 | 1  | 571_572insG                      |
| Frame shift | Gh_A09G0179 | 2  | 1144_1145insT                    |
| Frame shift | Gh_A09G0186 | 2  | 1856delC                         |
| Frame shift | Gh_A09G0186 | 3  | 2134_2135del                     |
| Frame shift | Gh_A09G0191 | 1  | 1delA                            |
| Frame shift | Gh_A09G0225 | 4  | 1043delT                         |

|             |             |    |                   |
|-------------|-------------|----|-------------------|
| Frame shift | Gh_A09G0233 | 6  | 2118_2119insT     |
| Frame shift | Gh_A09G0261 | 4  | 2062_2063insC     |
| Frame shift | Gh_A09G0269 | 3  | 930_930del        |
| Frame shift | Gh_A09G0270 | 3  | 189_190del        |
| Frame shift | Gh_A09G0354 | 1  | 79_80insGT        |
| Frame shift | Gh_A09G0511 | 2  | 431_432insT       |
| Frame shift | Gh_A09G0535 | 2  | 392delC           |
| Frame shift | Gh_A09G0536 | 19 | 1794_1795insT     |
| Frame shift | Gh_A09G0742 | 1  | 236delA           |
| Frame shift | Gh_A09G0745 | 1  | 371delG           |
| Frame shift | Gh_A09G0821 | 1  | 2_3insAGTGGCG     |
| Frame shift | Gh_A09G0834 | 1  | 40_41insG         |
| Frame shift | Gh_A09G0834 | 2  | 195delC           |
| Frame shift | Gh_A09G0834 | 2  | 298_299insT       |
| Frame shift | Gh_A09G1043 | 2  | 30_55del          |
| Frame shift | Gh_A09G1052 | 2  | 684delT           |
| Frame shift | Gh_A09G1085 | 4  | 1678_1679insAA    |
| Frame shift | Gh_A09G1148 | 4  | 1157_1158insTTTTT |
| Frame shift | Gh_A09G1186 | 6  | 1305_1306insAT    |
| Frame shift | Gh_A09G1190 | 2  | 616_617insA       |
| Frame shift | Gh_A09G1205 | 7  | 1148_1149insAA    |
| Frame shift | Gh_A09G1205 | 7  | 1196_1200del      |
| Frame shift | Gh_A09G1250 | 6  | 804delC           |
| Frame shift | Gh_A09G1333 | 1  | 79_82del          |
| Frame shift | Gh_A09G1359 | 1  | 1374delC          |
| Frame shift | Gh_A09G1372 | 9  | 2580_2581insA     |
| Frame shift | Gh_A09G1380 | 7  | 636_637insGA      |
| Frame shift | Gh_A09G1408 | 2  | 774_777del        |
| Frame shift | Gh_A09G1457 | 3  | 1345delA          |
| Frame shift | Gh_A09G1522 | 20 | 2953delT          |
| Frame shift | Gh_A09G1537 | 11 | 1314_1315insCCCC  |
| Frame shift | Gh_A09G1545 | 2  | 1623delG          |
| Frame shift | Gh_A09G1549 | 2  | 126delA           |
| Frame shift | Gh_A09G1602 | 4  | 668_669insGAAAT   |
| Frame shift | Gh_A09G1634 | 1  | 430delT           |
| Frame shift | Gh_A09G1634 | 1  | 397delT           |
| Frame shift | Gh_A09G1741 | 1  | 177delC           |
| Frame shift | Gh_A09G1846 | 3  | 744delA           |
| Frame shift | Gh_A09G1897 | 2  | 1070_1071insT     |
| Frame shift | Gh_A09G2021 | 1  | 162_163insT       |
| Frame shift | Gh_A09G2091 | 2  | 186_187insT       |
| Frame shift | Gh_A09G2208 | 2  | 502_503insCC      |
| Frame shift | Gh_A09G2287 | 2  | 202delA           |
| Frame shift | Gh_A09G2355 | 4  | 1711_1714del      |
| Frame shift | Gh_A09G2422 | 2  | 427_433del        |
| Frame shift | Gh_A09G2463 | 1  | 231delA           |
| Frame shift | Gh_A09G2525 | 2  | 238delA           |
| Frame shift | Gh_A10G0072 | 2  | 417_418insC       |

|             |             |            |                |
|-------------|-------------|------------|----------------|
| Frame shift | Gh_A10G0102 | 1          | 422_423insT    |
| Frame shift | Gh_A10G0129 | 4          | 639_654del     |
| Frame shift | Gh_A10G0134 | 1          | 14_15insAG     |
| Frame shift | Gh_A10G0434 | 3          | 533delC        |
| Frame shift | Gh_A10G0434 | 5          | 954delA        |
| Frame shift | Gh_A10G0501 | 1          | 523delC        |
| Frame shift | Gh_A10G0538 | 1          | 153_154del     |
| Frame shift | Gh_A10G0554 | 1          | 446delA        |
| Frame shift | Gh_A10G0731 | 5          | 579delT        |
| Frame shift | Gh_A10G0917 | 1          | 150delA        |
| Frame shift | Gh_A10G0938 | 12         | 2447delA       |
| Frame shift | Gh_A10G0938 | 3          | 476delC        |
| Frame shift | Gh_A10G0941 | 1          | 34_35insT      |
| Frame shift | Gh_A10G1005 | 1          | 310_311del     |
| Frame shift | Gh_A10G1012 | 1          | 1delA          |
| Frame shift | Gh_A10G1129 | 2          | 724_725insTA   |
| Frame shift | Gh_A10G1205 | 7          | 793_794del     |
| Frame shift | Gh_A10G1481 | 1          | 173_174insC    |
| Frame shift | Gh_A10G1541 | Whole gene |                |
| Frame shift | Gh_A10G1560 | 1          | 657delC        |
| Frame shift | Gh_A10G1616 | 3          | 321delA        |
| Frame shift | Gh_A10G1669 | 1          | 97delT         |
| Frame shift | Gh_A10G1722 | 2          | 1474delA       |
| Frame shift | Gh_A10G1743 | 1          | 179delC        |
| Frame shift | Gh_A10G1827 | 3          | 120_142del     |
| Frame shift | Gh_A10G1850 | 14         | 1883_1914del   |
| Frame shift | Gh_A10G1875 | 1          | 1747_1748insC  |
| Frame shift | Gh_A10G1974 | 5          | 488_489insC    |
| Frame shift | Gh_A10G2007 | 6          | 678_679insA    |
| Frame shift | Gh_A10G2012 | 1          | 2_3insAT       |
| Frame shift | Gh_A10G2042 | 1          | 418_419insT    |
| Frame shift | Gh_A10G2087 | 2          | 563_564insA    |
| Frame shift | Gh_A10G2109 | Whole gene |                |
| Frame shift | Gh_A10G2112 | 1          | 853_854insA    |
| Frame shift | Gh_A10G2113 | 2          | 632_633del     |
| Frame shift | Gh_A10G2286 | 2          | 241_242insGGGG |
| Frame shift | Gh_A10G2357 | 2          | 1136delC       |
| Frame shift | Gh_A11G0007 | 1          | 11_12insAGAAG  |
| Frame shift | Gh_A11G0189 | 18         | 3579_3580insTT |
| Frame shift | Gh_A11G0281 | 2          | 789_790insT    |
| Frame shift | Gh_A11G0284 | 8          | 825_826insC    |
| Frame shift | Gh_A11G0296 | 5          | 401delT        |
| Frame shift | Gh_A11G0312 | 2          | 299delC        |
| Frame shift | Gh_A11G0313 | 3          | 910delC        |
| Frame shift | Gh_A11G0343 | 3          | 364_365insAT   |
| Frame shift | Gh_A11G0357 | 4          | 1648_1649insCC |
| Frame shift | Gh_A11G0379 | 1          | 1_2insA        |
| Frame shift | Gh_A11G0414 | 1          | 424_425insT    |

|             |             |            |                 |
|-------------|-------------|------------|-----------------|
| Frame shift | Gh_A11G0432 | 4          | 582delA         |
| Frame shift | Gh_A11G0632 | 3          | 215_216insGGGAA |
| Frame shift | Gh_A11G0644 | 1          | 9_13del         |
| Frame shift | Gh_A11G0663 | 6          | 756delG         |
| Frame shift | Gh_A11G0679 | 1          | 333delC         |
| Frame shift | Gh_A11G0679 | 1          | 455_456insT     |
| Frame shift | Gh_A11G0694 | 1          | 37delG          |
| Frame shift | Gh_A11G0703 | 2          | 572_573insT     |
| Frame shift | Gh_A11G0763 | 1          | 111_114del      |
| Frame shift | Gh_A11G0766 | 8          | 700_701del      |
| Frame shift | Gh_A11G0849 | 1          | 29_42del        |
| Frame shift | Gh_A11G0877 | 1          | 837delG         |
| Frame shift | Gh_A11G0899 | 1          | 1183delC        |
| Frame shift | Gh_A11G0990 | 1          | 349_382del      |
| Frame shift | Gh_A11G0998 | 1          | 754delT         |
| Frame shift | Gh_A11G1363 | 1          | 131_132insA     |
| Frame shift | Gh_A11G1363 | 2          | 650_651insTA    |
| Frame shift | Gh_A11G1406 | 1          | 201delA         |
| Frame shift | Gh_A11G1414 | 1          | 97_98insAT      |
| Frame shift | Gh_A11G1460 | 1          | 4_5del          |
| Frame shift | Gh_A11G1476 | 1          | 304_305insC     |
| Frame shift | Gh_A11G1505 | 1          | 1delA           |
| Frame shift | Gh_A11G1512 | 2          | 260delC         |
| Frame shift | Gh_A11G1515 | 1          | 170_171insTT    |
| Frame shift | Gh_A11G1517 | 1          | 161delA         |
| Frame shift | Gh_A11G1521 | 3          | 218_219del      |
| Frame shift | Gh_A11G1524 | 3          | 1355_1356insT   |
| Frame shift | Gh_A11G1526 | 5          | 985delT         |
| Frame shift | Gh_A11G1534 | 1          | 54_57del        |
| Frame shift | Gh_A11G1568 | 6          | 1911delT        |
| Frame shift | Gh_A11G1641 | 6          | 653delT         |
| Frame shift | Gh_A11G1641 | 6          | 702_703insAA    |
| Frame shift | Gh_A11G1884 | 2          | 58delC          |
| Frame shift | Gh_A11G1904 | 1          | 766_767del      |
| Frame shift | Gh_A11G1954 | 3          | 437_438insC     |
| Frame shift | Gh_A11G1958 | 4          | 1819_1820del    |
| Frame shift | Gh_A11G2059 | 1          | 82delG          |
| Frame shift | Gh_A11G2101 | 2          | 216_217insA     |
| Frame shift | Gh_A11G2152 | 1          | 92_93del        |
| Frame shift | Gh_A11G2161 | 2          | 860delA         |
| Frame shift | Gh_A11G2184 | 1          | 453delC         |
| Frame shift | Gh_A11G2299 | 3          | 282_283insG     |
| Frame shift | Gh_A11G2299 | Whole gene |                 |
| Frame shift | Gh_A11G2559 | 3          | 1598_1599del    |
| Frame shift | Gh_A11G2622 | 3          | 629delC         |
| Frame shift | Gh_A11G2636 | 3          | 783_784insTTTCT |
| Frame shift | Gh_A11G2636 | 4          | 853_854insCACTA |
| Frame shift | Gh_A11G2680 | 3          | 997_998insTT    |

|             |             |            |                |
|-------------|-------------|------------|----------------|
| Frame shift | Gh_A11G2685 | 2          | 54delA         |
| Frame shift | Gh_A11G2748 | 5          | 1215_1215del   |
| Frame shift | Gh_A11G2779 | 2          | 143_144insG    |
| Frame shift | Gh_A11G2783 | 1          | 826_827insA    |
| Frame shift | Gh_A11G2904 | 1          | 894_895insA    |
| Frame shift | Gh_A11G2925 | 3          | 225delG        |
| Frame shift | Gh_A11G2940 | 2          | 496delC        |
| Frame shift | Gh_A11G3022 | 5          | 875_876del     |
| Frame shift | Gh_A11G3067 | 6          | 1673delA       |
| Frame shift | Gh_A11G3076 | 1          | 49delG         |
| Frame shift | Gh_A12G0084 | Whole gene |                |
| Frame shift | Gh_A12G0250 | 14         | 1850_1851insC  |
| Frame shift | Gh_A12G0386 | Whole gene |                |
| Frame shift | Gh_A12G0408 | 4          | 1556delC       |
| Frame shift | Gh_A12G0447 | 8          | 1013delC       |
| Frame shift | Gh_A12G0528 | 1          | 170delC        |
| Frame shift | Gh_A12G0534 | 4          | 496_497insA    |
| Frame shift | Gh_A12G0536 | 2          | 617_621del     |
| Frame shift | Gh_A12G0569 | 1          | 219_220insA    |
| Frame shift | Gh_A12G0576 | 2          | 343_344insAA   |
| Frame shift | Gh_A12G0627 | 8          | 2092delA       |
| Frame shift | Gh_A12G0659 | 4          | 268delA        |
| Frame shift | Gh_A12G0729 | 2          | 414delC        |
| Frame shift | Gh_A12G0731 | 3          | 108_111del     |
| Frame shift | Gh_A12G0740 | 1          | 283_284insG    |
| Frame shift | Gh_A12G0777 | 11         | 1029_1030insA  |
| Frame shift | Gh_A12G0780 | 3          | 364_376del     |
| Frame shift | Gh_A12G0790 | 6          | 815delG        |
| Frame shift | Gh_A12G0791 | 7          | 1841_1844del   |
| Frame shift | Gh_A12G0812 | 5          | 1191delT       |
| Frame shift | Gh_A12G0839 | 1          | 955delG        |
| Frame shift | Gh_A12G0842 | 5          | 472delA        |
| Frame shift | Gh_A12G0879 | 8          | 528delA        |
| Frame shift | Gh_A12G0911 | 4          | 756_759del     |
| Frame shift | Gh_A12G0978 | 1          | 5_6insG        |
| Frame shift | Gh_A12G0996 | 5          | 741_742insT    |
| Frame shift | Gh_A12G1014 | 1          | 25_26insT      |
| Frame shift | Gh_A12G1023 | 5          | 2938_2941del   |
| Frame shift | Gh_A12G1055 | 1          | 973delG        |
| Frame shift | Gh_A12G1117 | 3          | 1483_1484insAT |
| Frame shift | Gh_A12G1120 | 1          | 93_94insA      |
| Frame shift | Gh_A12G1134 | 1          | 329_330insT    |
| Frame shift | Gh_A12G1147 | 1          | 222_223insG    |
| Frame shift | Gh_A12G1189 | 5          | 279_280insC    |
| Frame shift | Gh_A12G1281 | 2          | 133delC        |
| Frame shift | Gh_A12G1283 | 6          | 877_878insA    |
| Frame shift | Gh_A12G1372 | 6          | 513delT        |
| Frame shift | Gh_A12G1473 | 14         | 1822_1823insT  |

|             |             |    |                                  |
|-------------|-------------|----|----------------------------------|
| Frame shift | Gh_A12G1473 | 18 | 2885_2886insA                    |
| Frame shift | Gh_A12G1504 | 3  | 871delC                          |
| Frame shift | Gh_A12G1540 | 1  | 100_115del                       |
| Frame shift | Gh_A12G1591 | 2  | 764delT                          |
| Frame shift | Gh_A12G1635 | 1  | 115_116insT                      |
| Frame shift | Gh_A12G1682 | 2  | 1455_1456insA                    |
| Frame shift | Gh_A12G1726 | 5  | 519delA                          |
| Frame shift | Gh_A12G1850 | 1  | 95delT                           |
| Frame shift | Gh_A12G1883 | 1  | 156_157insA                      |
| Frame shift | Gh_A12G1980 | 1  | 47delT                           |
| Frame shift | Gh_A12G2017 | 1  | 86_108del                        |
| Frame shift | Gh_A12G2059 | 4  | 830delC                          |
| Frame shift | Gh_A12G2368 | 4  | 1586_1587insT                    |
| Frame shift | Gh_A12G2377 | 1  | 270_271insAT                     |
| Frame shift | Gh_A12G2434 | 1  | 1_2insA                          |
| Frame shift | Gh_A12G2538 | 6  | 388_389insAAAGAGAAGCTGCTCGAATTGC |
| Frame shift | Gh_A12G2556 | 1  | 1_2insA                          |
| Frame shift | Gh_A12G2561 | 3  | 864delC                          |
| Frame shift | Gh_A12G2569 | 4  | 766delC                          |
| Frame shift | Gh_A12G2586 | 4  | 716_717insG                      |
| Frame shift | Gh_A12G2673 | 1  | 1delA                            |
| Frame shift | Gh_A13G0019 | 1  | 5delT                            |
| Frame shift | Gh_A13G0073 | 14 | 2318_2319insA                    |
| Frame shift | Gh_A13G0091 | 1  | 908_921del                       |
| Frame shift | Gh_A13G0141 | 1  | 795delT                          |
| Frame shift | Gh_A13G0152 | 1  | 39_40insC                        |
| Frame shift | Gh_A13G0152 | 3  | 506_507insT                      |
| Frame shift | Gh_A13G0155 | 2  | 194_195insA                      |
| Frame shift | Gh_A13G0155 | 2  | 323delA                          |
| Frame shift | Gh_A13G0173 | 1  | 1056_1063del                     |
| Frame shift | Gh_A13G0175 | 1  | 318_319insA                      |
| Frame shift | Gh_A13G0206 | 1  | 373delA                          |
| Frame shift | Gh_A13G0206 | 1  | 390_394del                       |
| Frame shift | Gh_A13G0324 | 3  | 119_120insC                      |
| Frame shift | Gh_A13G0392 | 1  | 1_2insA                          |
| Frame shift | Gh_A13G0779 | 3  | 1989delA                         |
| Frame shift | Gh_A13G0802 | 6  | 1279_1280insA                    |
| Frame shift | Gh_A13G0831 | 1  | 385_386insGTGCA                  |
| Frame shift | Gh_A13G0918 | 4  | 340delC                          |
| Frame shift | Gh_A13G0942 | 8  | 807_808insT                      |
| Frame shift | Gh_A13G0943 | 15 | 1048delC                         |
| Frame shift | Gh_A13G0972 | 1  | 309_310insG                      |
| Frame shift | Gh_A13G0979 | 1  | 536delG                          |
| Frame shift | Gh_A13G0983 | 1  | 20_23del                         |
| Frame shift | Gh_A13G1010 | 3  | 286_287insT                      |
| Frame shift | Gh_A13G1021 | 1  | 1_2insA                          |
| Frame shift | Gh_A13G1146 | 2  | 572delA                          |
| Frame shift | Gh_A13G1156 | 1  | 385_386insA                      |

|             |             |    |                                                   |
|-------------|-------------|----|---------------------------------------------------|
| Frame shift | Gh_A13G1234 | 3  | 298_301del                                        |
| Frame shift | Gh_A13G1234 | 5  | 783delT                                           |
| Frame shift | Gh_A13G1313 | 2  | 180delA                                           |
| Frame shift | Gh_A13G1315 | 4  | 1287delT                                          |
| Frame shift | Gh_A13G1329 | 2  | 504_505del                                        |
| Frame shift | Gh_A13G1380 | 2  | 822_823insTT                                      |
| Frame shift | Gh_A13G1648 | 2  | 228delT                                           |
| Frame shift | Gh_A13G1656 | 4  | 653_654insAAGGTTGATGGAACCATCACCGGCTGAATCTG<br>ATC |
| Frame shift | Gh_A13G1677 | 16 | 2373_2374del                                      |
| Frame shift | Gh_A13G1677 | 25 | 3477_3478insG                                     |
| Frame shift | Gh_A13G1677 | 28 | 3816_3817insT                                     |
| Frame shift | Gh_A13G1718 | 1  | 88delT                                            |
| Frame shift | Gh_A13G1752 | 1  | 9_18del                                           |
| Frame shift | Gh_A13G1754 | 1  | 110delA                                           |
| Frame shift | Gh_A13G1761 | 1  | 12_13insAA                                        |
| Frame shift | Gh_A13G1779 | 11 | 2722_2725del                                      |
| Frame shift | Gh_A13G1814 | 4  | 610_611insA                                       |
| Frame shift | Gh_A13G1818 | 2  | 238_239insAAGTA                                   |
| Frame shift | Gh_A13G1831 | 1  | 229_230insA                                       |
| Frame shift | Gh_A13G1836 | 1  | 211delG                                           |
| Frame shift | Gh_A13G1907 | 2  | 641_642del                                        |
| Frame shift | Gh_A13G1940 | 1  | 1_2insA                                           |
| Frame shift | Gh_A13G1971 | 2  | 37_41del                                          |
| Frame shift | Gh_A13G1988 | 1  | 334_335insT                                       |
| Frame shift | Gh_A13G1997 | 1  | 1delA                                             |
| Frame shift | Gh_A13G2042 | 2  | 167_168insC                                       |
| Frame shift | Gh_A13G2234 | 1  | 59delG                                            |
| Frame shift | Gh_A13G2349 | 2  | 353_354insA                                       |
| Frame shift | Gh_D01G0131 | 3  | 514_515insC                                       |
| Frame shift | Gh_D01G0289 | 15 | 1474_1475insA                                     |
| Frame shift | Gh_D01G0326 | 10 | 981_982insTT                                      |
| Frame shift | Gh_D01G0333 | 2  | 1137delA                                          |
| Frame shift | Gh_D01G0361 | 4  | 1102_1103insT                                     |
| Frame shift | Gh_D01G0433 | 2  | 121_122insT                                       |
| Frame shift | Gh_D01G0440 | 1  | 1141delG                                          |
| Frame shift | Gh_D01G0615 | 1  | 502delA                                           |
| Frame shift | Gh_D01G0639 | 1  | 582_588del                                        |
| Frame shift | Gh_D01G0642 | 1  | 49_50insC                                         |
| Frame shift | Gh_D01G0776 | 6  | 549delA                                           |
| Frame shift | Gh_D01G0820 | 1  | 185_206del                                        |
| Frame shift | Gh_D01G1028 | 5  | 697_698insT                                       |
| Frame shift | Gh_D01G1031 | 1  | 33delG                                            |
| Frame shift | Gh_D01G1051 | 2  | 336delA                                           |
| Frame shift | Gh_D01G1143 | 2  | 93_94insA                                         |
| Frame shift | Gh_D01G1161 | 1  | 507delT                                           |
| Frame shift | Gh_D01G1189 | 2  | 903delT                                           |
| Frame shift | Gh_D01G1265 | 2  | 531delA                                           |
| Frame shift | Gh_D01G1281 | 4  | 895_896insA                                       |

[illegible]



|             |             |    |                                   |
|-------------|-------------|----|-----------------------------------|
| Frame shift | Gh_D02G0207 | 9  | 949_964del                        |
| Frame shift | Gh_D02G0211 | 4  | 3205_3206insG                     |
| Frame shift | Gh_D02G0211 | 5  | 3398_3399insA                     |
| Frame shift | Gh_D02G0221 | 5  | 1389delA                          |
| Frame shift | Gh_D02G0232 | 2  | 1115delT                          |
| Frame shift | Gh_D02G0233 | 2  | 2456delA                          |
| Frame shift | Gh_D02G0299 | 2  | 338delC                           |
| Frame shift | Gh_D02G0299 | 2  | 659delA                           |
| Frame shift | Gh_D02G0339 | 1  | 173delC                           |
| Frame shift | Gh_D02G0339 | 2  | 1304_1305insA                     |
| Frame shift | Gh_D02G0393 | 1  | 1delA                             |
| Frame shift | Gh_D02G0451 | 1  | 194_195insA                       |
| Frame shift | Gh_D02G0469 | 1  | 52delT                            |
| Frame shift | Gh_D02G0524 | 1  | 676_677insGGTGC                   |
| Frame shift | Gh_D02G0532 | 1  | 69_70insG                         |
| Frame shift | Gh_D02G0581 | 1  | 447_447del                        |
| Frame shift | Gh_D02G0694 | 1  | 151delA                           |
| Frame shift | Gh_D02G0708 | 1  | 794_795insG                       |
| Frame shift | Gh_D02G0765 | 4  | 1385_1397del                      |
| Frame shift | Gh_D02G0769 | 2  | 1252_1253insCA                    |
| Frame shift | Gh_D02G0826 | 5  | 570_571insG                       |
| Frame shift | Gh_D02G0870 | 1  | 38_39insG                         |
| Frame shift | Gh_D02G0924 | 3  | 354delT                           |
| Frame shift | Gh_D02G0956 | 4  | 541delT                           |
| Frame shift | Gh_D02G0971 | 9  | 5307delT                          |
| Frame shift | Gh_D02G1252 | 2  | 754delA                           |
| Frame shift | Gh_D02G1284 | 1  | 387_388insA                       |
| Frame shift | Gh_D02G1368 | 3  | 246delG                           |
| Frame shift | Gh_D02G1437 | 1  | 318delC                           |
| Frame shift | Gh_D02G1494 | 1  | 344_345del                        |
| Frame shift | Gh_D02G1506 | 2  | 543_544insG                       |
| Frame shift | Gh_D02G1512 | 4  | 794_795insG                       |
| Frame shift | Gh_D02G1523 | 1  | 81delA                            |
| Frame shift | Gh_D02G1572 | 3  | 171delC                           |
| Frame shift | Gh_D02G1816 | 5  | 973_974insT                       |
| Frame shift | Gh_D02G1855 | 2  | 1515_1516insA                     |
| Frame shift | Gh_D02G1951 | 3  | 481_482del                        |
| Frame shift | Gh_D02G2072 | 5  | 3060_3084del                      |
| Frame shift | Gh_D02G2090 | 4  | 513delT                           |
| Frame shift | Gh_D02G2121 | 1  | 181_182insGG                      |
| Frame shift | Gh_D02G2171 | 2  | 281_282insT                       |
| Frame shift | Gh_D02G2198 | 1  | 1_2insA                           |
| Frame shift | Gh_D02G2229 | 4  | 335_336insC                       |
| Frame shift | Gh_D02G2248 | 1  | 1delA                             |
| Frame shift | Gh_D02G2352 | 2  | 183_184insGTCCTTGCAAGAAAGATCATGAA |
| Frame shift | Gh_D02G2352 | 3  | 424delG                           |
| Frame shift | Gh_D02G2377 | 11 | 959_960insT                       |
| Frame shift | Gh_D03G0061 | 2  | 73_74insCTGGTCTGAAATCGTCCTCCGCC   |

|             |             |            |                                 |
|-------------|-------------|------------|---------------------------------|
| Frame shift | Gh_D03G0076 | 11         | 3554_3555insA                   |
| Frame shift | Gh_D03G0303 | 2          | 2929_2930insC                   |
| Frame shift | Gh_D03G0452 | Whole gene |                                 |
| Frame shift | Gh_D03G0599 | 5          | 359delC                         |
| Frame shift | Gh_D03G0633 | 3          | 306_307insGA                    |
| Frame shift | Gh_D03G0694 | 5          | 1741_1742insT                   |
| Frame shift | Gh_D03G0753 | 3          | 649_650insA                     |
| Frame shift | Gh_D03G1316 | 1          | 206_207insT                     |
| Frame shift | Gh_D03G1441 | 1          | 628_629insT                     |
| Frame shift | Gh_D03G1468 | 5          | 1168_1169insA                   |
| Frame shift | Gh_D03G1527 | 3          | 2446_2450del                    |
| Frame shift | Gh_D03G1568 | 1          | 1_2insA                         |
| Frame shift | Gh_D03G1573 | 1          | 342_343insTCACGCTTACC           |
| Frame shift | Gh_D03G1596 | 1          | 252_253insT                     |
| Frame shift | Gh_D03G1693 | 7          | 611delT                         |
| Frame shift | Gh_D03G1693 | 9          | 1311delT                        |
| Frame shift | Gh_D03G1715 | 3          | 243_244insA                     |
| Frame shift | Gh_D03G1753 | 3          | 129_130insA                     |
| Frame shift | Gh_D03G1755 | 22         | 3832_3833insTGCAGTTCCAGAACTCGGA |
| Frame shift | Gh_D03G1758 | 3          | 569_570insATCCCAA               |
| Frame shift | Gh_D03G1838 | 11         | 795_796insT                     |
| Frame shift | Gh_D03G1860 | 2          | 649_650insT                     |
| Frame shift | Gh_D04G0013 | 1          | 18delT                          |
| Frame shift | Gh_D04G0055 | 14         | 1313_1314insA                   |
| Frame shift | Gh_D04G0174 | 1          | 267delT                         |
| Frame shift | Gh_D04G0202 | 1          | 77delC                          |
| Frame shift | Gh_D04G0238 | 1          | 1574delC                        |
| Frame shift | Gh_D04G0255 | 2          | 2428_2429insAGTA                |
| Frame shift | Gh_D04G0259 | 1          | 313_314insAGTA                  |
| Frame shift | Gh_D04G0336 | 1          | 768delT                         |
| Frame shift | Gh_D04G0359 | 1          | 597_598del                      |
| Frame shift | Gh_D04G0413 | 1          | 33_34insCTTA                    |
| Frame shift | Gh_D04G0419 | 10         | 1740_1741insG                   |
| Frame shift | Gh_D04G0419 | 4          | 675_676insA                     |
| Frame shift | Gh_D04G0430 | 1          | 200_201del                      |
| Frame shift | Gh_D04G0440 | 3          | 1338delC                        |
| Frame shift | Gh_D04G0501 | 2          | 300_301del                      |
| Frame shift | Gh_D04G0556 | 1          | 155_171del                      |
| Frame shift | Gh_D04G0610 | 7          | 1638_1639insG                   |
| Frame shift | Gh_D04G0656 | 14         | 2286_2289del                    |
| Frame shift | Gh_D04G0799 | 1          | 242_243insA                     |
| Frame shift | Gh_D04G0822 | 1          | 223_224insAA                    |
| Frame shift | Gh_D04G0862 | 1          | 142delG                         |
| Frame shift | Gh_D04G0877 | 2          | 179delA                         |
| Frame shift | Gh_D04G0881 | 2          | 219delG                         |
| Frame shift | Gh_D04G0881 | 3          | 867delC                         |
| Frame shift | Gh_D04G0889 | 2          | 254_255insT                     |
| Frame shift | Gh_D04G0889 | 3          | 321_327del                      |

|             |             |            |                                |
|-------------|-------------|------------|--------------------------------|
| Frame shift | Gh_D04G0904 | 1          | 21_22insGAAAG                  |
| Frame shift | Gh_D04G0909 | 4          | 448delC                        |
| Frame shift | Gh_D04G0910 | 3          | 643_644del                     |
| Frame shift | Gh_D04G0915 | 1          | 553_593del                     |
| Frame shift | Gh_D04G0957 | Whole gene |                                |
| Frame shift | Gh_D04G0977 | 1          | 368_371del                     |
| Frame shift | Gh_D04G1004 | 2          | 35_36insG                      |
| Frame shift | Gh_D04G1022 | 1          | 1017_1018insAC                 |
| Frame shift | Gh_D04G1034 | 4          | 424_425del                     |
| Frame shift | Gh_D04G1037 | 1          | 705delA                        |
| Frame shift | Gh_D04G1095 | 1          | 627delC                        |
| Frame shift | Gh_D04G1100 | 1          | 44delC                         |
| Frame shift | Gh_D04G1100 | 2          | 399_400insTGCAAAAATCCACGAGTTGT |
| Frame shift | Gh_D04G1142 | 4          | 1316_1317insAG                 |
| Frame shift | Gh_D04G1150 | 8          | 1300_1301insC                  |
| Frame shift | Gh_D04G1236 | 6          | 1158delT                       |
| Frame shift | Gh_D04G1249 | 1          | 224delT                        |
| Frame shift | Gh_D04G1287 | 5          | 1449_1450del                   |
| Frame shift | Gh_D04G1308 | 2          | 515_519del                     |
| Frame shift | Gh_D04G1339 | 2          | 268_269insT                    |
| Frame shift | Gh_D04G1429 | 1          | 609_610insG                    |
| Frame shift | Gh_D04G1477 | 3          | 911delA                        |
| Frame shift | Gh_D04G1477 | 7          | 1784_1785del                   |
| Frame shift | Gh_D04G1493 | 1          | 631_632insA                    |
| Frame shift | Gh_D04G1592 | 1          | 28_29insC                      |
| Frame shift | Gh_D04G1678 | 5          | 815delA                        |
| Frame shift | Gh_D04G1688 | 1          | 617_624del                     |
| Frame shift | Gh_D04G1763 | 7          | 1819delT                       |
| Frame shift | Gh_D04G1816 | 6          | 1491_1492insG                  |
| Frame shift | Gh_D04G1827 | 4          | 1106_1113del                   |
| Frame shift | Gh_D04G1838 | 3          | 834_835insCACT                 |
| Frame shift | Gh_D04G1939 | 1          | 1_2insA                        |
| Frame shift | Gh_D04G1950 | 1          | 626_645del                     |
| Frame shift | Gh_D04G1974 | 3          | 336delC                        |
| Frame shift | Gh_D04G1979 | 1          | 12_13insA                      |
| Frame shift | Gh_D04G1982 | 4          | 553_554del                     |
| Frame shift | Gh_D04G1983 | 2          | 183_184insTT                   |
| Frame shift | Gh_D04G2010 | 5          | 914_915insG                    |
| Frame shift | Gh_D04G2024 | 8          | 1483delA                       |
| Frame shift | Gh_D04G2028 | 1          | 6delA                          |
| Frame shift | Gh_D05G0097 | 1          | 1delA                          |
| Frame shift | Gh_D05G0298 | 1          | 733delA                        |
| Frame shift | Gh_D05G0298 | 2          | 888_889del                     |
| Frame shift | Gh_D05G0581 | 8          | 1029delT                       |
| Frame shift | Gh_D05G0634 | 6          | 608_609del                     |
| Frame shift | Gh_D05G1072 | 1          | 633delA                        |
| Frame shift | Gh_D05G1099 | 7          | 1380delA                       |
| Frame shift | Gh_D05G1103 | 6          | 992_993insA                    |

|             |             |    |                      |
|-------------|-------------|----|----------------------|
| Frame shift | Gh_D05G1177 | 2  | 724_725insGCCTGTCC   |
| Frame shift | Gh_D05G1196 | 2  | 339_342del           |
| Frame shift | Gh_D05G1441 | 1  | 350_351del           |
| Frame shift | Gh_D05G1452 | 1  | 117delA              |
| Frame shift | Gh_D05G1541 | 2  | 111delT              |
| Frame shift | Gh_D05G1541 | 3  | 221delC              |
| Frame shift | Gh_D05G1694 | 1  | 1delA                |
| Frame shift | Gh_D05G1757 | 3  | 222delG              |
| Frame shift | Gh_D05G1791 | 1  | 409_410insA          |
| Frame shift | Gh_D05G1807 | 7  | 1011_1012del         |
| Frame shift | Gh_D05G1884 | 1  | 44_45insGG           |
| Frame shift | Gh_D05G2001 | 4  | 430_442del           |
| Frame shift | Gh_D05G2258 | 2  | 275_276insCC         |
| Frame shift | Gh_D05G2422 | 4  | 200_201insT          |
| Frame shift | Gh_D05G2749 | 3  | 599_612del           |
| Frame shift | Gh_D05G2763 | 1  | 290_291insTTTT       |
| Frame shift | Gh_D05G2818 | 2  | 148_149insA          |
| Frame shift | Gh_D05G2903 | 1  | 636_643del           |
| Frame shift | Gh_D05G3181 | 3  | 755_756insG          |
| Frame shift | Gh_D05G3196 | 7  | 1045_1045del         |
| Frame shift | Gh_D05G3257 | 3  | 1639delT             |
| Frame shift | Gh_D05G3277 | 1  | 213_214del           |
| Frame shift | Gh_D05G3376 | 3  | 1917delC             |
| Frame shift | Gh_D05G3381 | 1  | 126delA              |
| Frame shift | Gh_D05G3473 | 2  | 891_892insT          |
| Frame shift | Gh_D05G3486 | 15 | 1307_1308insT        |
| Frame shift | Gh_D05G3551 | 1  | 847_848insT          |
| Frame shift | Gh_D05G3572 | 1  | 151_152insT          |
| Frame shift | Gh_D05G3583 | 1  | 92_93insCG           |
| Frame shift | Gh_D05G3587 | 1  | 1221delC             |
| Frame shift | Gh_D05G3602 | 3  | 1285delA             |
| Frame shift | Gh_D05G3615 | 1  | 507_508del           |
| Frame shift | Gh_D05G3631 | 2  | 533_534insCCTAGCGG   |
| Frame shift | Gh_D05G3663 | 1  | 1569_1617del         |
| Frame shift | Gh_D05G3667 | 5  | 374_375insG          |
| Frame shift | Gh_D05G3670 | 1  | 2570delT             |
| Frame shift | Gh_D05G3675 | 1  | 1delA                |
| Frame shift | Gh_D05G3696 | 2  | 798_799del           |
| Frame shift | Gh_D05G3696 | 2  | 1101_1116del         |
| Frame shift | Gh_D05G3696 | 2  | 1503_1504insTCGAATGG |
| Frame shift | Gh_D05G3724 | 2  | 47_48insT            |
| Frame shift | Gh_D05G3833 | 8  | 1290delG             |
| Frame shift | Gh_D05G3864 | 3  | 746_747insT          |
| Frame shift | Gh_D06G0096 | 2  | 1288_1289insA        |
| Frame shift | Gh_D06G0251 | 4  | 1250_1251del         |
| Frame shift | Gh_D06G0306 | 1  | 84delA               |
| Frame shift | Gh_D06G0310 | 2  | 450delT              |
| Frame shift | Gh_D06G0314 | 1  | 143delA              |

|             |             |            |                  |
|-------------|-------------|------------|------------------|
| Frame shift | Gh_D06G0327 | 1          | 464_465insT      |
| Frame shift | Gh_D06G0341 | 2          | 782_785del       |
| Frame shift | Gh_D06G0363 | 4          | 245delC          |
| Frame shift | Gh_D06G0389 | 1          | 664_665insA      |
| Frame shift | Gh_D06G0478 | 1          | 80delG           |
| Frame shift | Gh_D06G0512 | 2          | 151_157del       |
| Frame shift | Gh_D06G0528 | 7          | 503_504insT      |
| Frame shift | Gh_D06G0535 | 3          | 469delT          |
| Frame shift | Gh_D06G0573 | 1          | 1350_1351insT    |
| Frame shift | Gh_D06G0651 | 5          | 804_805insC      |
| Frame shift | Gh_D06G0652 | 9          | 1219_1220insT    |
| Frame shift | Gh_D06G0722 | 1          | 80_81insA        |
| Frame shift | Gh_D06G0728 | 2          | 307_308insT      |
| Frame shift | Gh_D06G0730 | 1          | 4_5insA          |
| Frame shift | Gh_D06G0739 | 1          | 94delA           |
| Frame shift | Gh_D06G0766 | 4          | 558_558del       |
| Frame shift | Gh_D06G0767 | 6          | 625_626insA      |
| Frame shift | Gh_D06G0820 | 3          | 798_799del       |
| Frame shift | Gh_D06G0932 | 1          | 140_141insG      |
| Frame shift | Gh_D06G0951 | 12         | 1519delC         |
| Frame shift | Gh_D06G0952 | 2          | 2974_2975del     |
| Frame shift | Gh_D06G0959 | 5          | 587_588del       |
| Frame shift | Gh_D06G0961 | 8          | 730_734del       |
| Frame shift | Gh_D06G1067 | 7          | 1393delC         |
| Frame shift | Gh_D06G1098 | 2          | 475_476insAA     |
| Frame shift | Gh_D06G1100 | 1          | 85delA           |
| Frame shift | Gh_D06G1191 | 1          | 222delC          |
| Frame shift | Gh_D06G1211 | 10         | 1926delT         |
| Frame shift | Gh_D06G1276 | 2          | 99delG           |
| Frame shift | Gh_D06G1295 | 6          | 1773_1774insTTGC |
| Frame shift | Gh_D06G1324 | 3          | 540_549del       |
| Frame shift | Gh_D06G1324 | Whole gene |                  |
| Frame shift | Gh_D06G1333 | 2          | 437_438insA      |
| Frame shift | Gh_D06G1360 | 1          | 1197delT         |
| Frame shift | Gh_D06G1360 | 1          | 1640delC         |
| Frame shift | Gh_D06G1419 | 1          | 281_282del       |
| Frame shift | Gh_D06G1471 | 5          | 897_898insG      |
| Frame shift | Gh_D06G1491 | 4          | 293delT          |
| Frame shift | Gh_D06G1522 | 6          | 490delT          |
| Frame shift | Gh_D06G1530 | 1          | 222_223insT      |
| Frame shift | Gh_D06G1557 | 4          | 587delT          |
| Frame shift | Gh_D06G1560 | 10         | 885delA          |
| Frame shift | Gh_D06G1560 | 4          | 367delT          |
| Frame shift | Gh_D06G1560 | 5          | 479_480del       |
| Frame shift | Gh_D06G1608 | 4          | 752_753insA      |
| Frame shift | Gh_D06G1642 | 1          | 43delC           |
| Frame shift | Gh_D06G1712 | 1          | 180delA          |
| Frame shift | Gh_D06G1765 | 4          | 1395delG         |

|             |             |    |                          |
|-------------|-------------|----|--------------------------|
| Frame shift | Gh_D06G1849 | 1  | 603_610del               |
| Frame shift | Gh_D06G1849 | 1  | 905_906insA              |
| Frame shift | Gh_D06G1876 | 1  | 32delA                   |
| Frame shift | Gh_D06G1877 | 3  | 2297_2298insG            |
| Frame shift | Gh_D06G1885 | 1  | 180_181insA              |
| Frame shift | Gh_D06G1929 | 2  | 147_174del               |
| Frame shift | Gh_D06G1995 | 1  | 20delA                   |
| Frame shift | Gh_D06G2031 | 3  | 1372_1381del             |
| Frame shift | Gh_D06G2074 | 2  | 856delT                  |
| Frame shift | Gh_D06G2116 | 9  | 904_905del               |
| Frame shift | Gh_D06G2116 | 9  | 819_820insA              |
| Frame shift | Gh_D06G2172 | 1  | 120delC                  |
| Frame shift | Gh_D06G2174 | 7  | 1341delA                 |
| Frame shift | Gh_D06G2177 | 1  | 192_193insT              |
| Frame shift | Gh_D06G2250 | 5  | 924_925insT              |
| Frame shift | Gh_D06G2250 | 8  | 1831delG                 |
| Frame shift | Gh_D06G2321 | 2  | 369delT                  |
| Frame shift | Gh_D06G2321 | 3  | 428_429insG              |
| Frame shift | Gh_D06G2343 | 4  | 465delA                  |
| Frame shift | Gh_D06G2355 | 2  | 570_571CTTG,             |
| Frame shift | Gh_D07G0072 | 10 | 1130delA                 |
| Frame shift | Gh_D07G0076 | 3  | 239delA                  |
| Frame shift | Gh_D07G0184 | 2  | 731delG                  |
| Frame shift | Gh_D07G0326 | 5  | 716_717insGT             |
| Frame shift | Gh_D07G0340 | 2  | 506_516del               |
| Frame shift | Gh_D07G0385 | 2  | 999delT                  |
| Frame shift | Gh_D07G0415 | 9  | 1127delA                 |
| Frame shift | Gh_D07G0478 | 2  | 339_340insCCAG           |
| Frame shift | Gh_D07G0517 | 1  | 470_471insA              |
| Frame shift | Gh_D07G0587 | 2  | 1687_1688insGA           |
| Frame shift | Gh_D07G0588 | 5  | 794_795del               |
| Frame shift | Gh_D07G0871 | 9  | 928_929insTTAACTTATCAAGT |
| Frame shift | Gh_D07G0877 | 4  | 1081_1082insG            |
| Frame shift | Gh_D07G1111 | 6  | 1275_1276insA            |
| Frame shift | Gh_D07G1111 | 6  | 1080_1081insT            |
| Frame shift | Gh_D07G1214 | 1  | 439_443del               |
| Frame shift | Gh_D07G1226 | 1  | 150_151insG              |
| Frame shift | Gh_D07G1373 | 8  | 738_739insA              |
| Frame shift | Gh_D07G1507 | 2  | 38delA                   |
| Frame shift | Gh_D07G1705 | 1  | 552_553insC              |
| Frame shift | Gh_D07G1709 | 2  | 127_128insCCACT          |
| Frame shift | Gh_D07G1748 | 1  | 292_293insA              |
| Frame shift | Gh_D07G1751 | 1  | 1909_1910insGA           |
| Frame shift | Gh_D07G1844 | 1  | 1886delT                 |
| Frame shift | Gh_D07G1982 | 1  | 28_32del                 |
| Frame shift | Gh_D07G2039 | 2  | 1250delG                 |
| Frame shift | Gh_D07G2084 | 3  | 314_315insGT             |
| Frame shift | Gh_D07G2106 | 9  | 1587_1588insG            |

|             |             |    |                        |
|-------------|-------------|----|------------------------|
| Frame shift | Gh_D07G2107 | 2  | 898_899insT            |
| Frame shift | Gh_D07G2107 | 3  | 1117_1118insA          |
| Frame shift | Gh_D07G2107 | 4  | 1360delT               |
| Frame shift | Gh_D07G2180 | 5  | 340_341insCAAACGGCAGAG |
| Frame shift | Gh_D07G2201 | 1  | 18_19insGGGGGGG        |
| Frame shift | Gh_D07G2253 | 9  | 3403_3407del           |
| Frame shift | Gh_D07G2254 | 1  | 1120delT               |
| Frame shift | Gh_D07G2264 | 2  | 556_557insT            |
| Frame shift | Gh_D07G2271 | 1  | 1315_1316insG          |
| Frame shift | Gh_D07G2364 | 3  | 635_636insGAGTT        |
| Frame shift | Gh_D08G0013 | 6  | 731_732insTC           |
| Frame shift | Gh_D08G0046 | 8  | 3255_3256insT          |
| Frame shift | Gh_D08G0083 | 2  | 78delA                 |
| Frame shift | Gh_D08G0281 | 1  | 224_225insT            |
| Frame shift | Gh_D08G0372 | 1  | 373_380del             |
| Frame shift | Gh_D08G0441 | 2  | 627_628insA            |
| Frame shift | Gh_D08G0443 | 2  | 425delT                |
| Frame shift | Gh_D08G0445 | 1  | 157delC                |
| Frame shift | Gh_D08G0480 | 11 | 2270delA               |
| Frame shift | Gh_D08G0482 | 4  | 1926delA               |
| Frame shift | Gh_D08G0487 | 11 | 1004delT               |
| Frame shift | Gh_D08G0528 | 5  | 1122_1123del           |
| Frame shift | Gh_D08G0555 | 1  | 1330_1331insA          |
| Frame shift | Gh_D08G0782 | 6  | 648_649insG            |
| Frame shift | Gh_D08G0792 | 1  | 331delG                |
| Frame shift | Gh_D08G0860 | 1  | 84delG                 |
| Frame shift | Gh_D08G1117 | 4  | 304_305insA            |
| Frame shift | Gh_D08G1118 | 1  | 83_84insCGACCTCA       |
| Frame shift | Gh_D08G1127 | 3  | 646delA                |
| Frame shift | Gh_D08G1252 | 5  | 374delA                |
| Frame shift | Gh_D08G1529 | 1  | 9delC                  |
| Frame shift | Gh_D08G1550 | 2  | 170delA                |
| Frame shift | Gh_D08G1551 | 5  | 1135_1136del           |
| Frame shift | Gh_D08G1781 | 1  | 56_57insT              |
| Frame shift | Gh_D08G1831 | 2  | 28delG                 |
| Frame shift | Gh_D08G1881 | 1  | 1517_1523del           |
| Frame shift | Gh_D08G1993 | 2  | 545delT                |
| Frame shift | Gh_D08G1995 | 10 | 1718_1721del           |
| Frame shift | Gh_D08G1995 | 3  | 474_475insAA           |
| Frame shift | Gh_D08G1995 | 4  | 771_772insT            |
| Frame shift | Gh_D08G2016 | 15 | 7908_7909insA          |
| Frame shift | Gh_D08G2057 | 1  | 368_369insA            |
| Frame shift | Gh_D08G2154 | 1  | 698_699del             |
| Frame shift | Gh_D08G2177 | 1  | 397delT                |
| Frame shift | Gh_D08G2236 | 1  | 144_145insACAAC        |
| Frame shift | Gh_D08G2274 | 5  | 649_655del             |
| Frame shift | Gh_D08G2312 | 2  | 828delT                |
| Frame shift | Gh_D08G2502 | 1  | 29_30del               |

|             |             |            |                         |
|-------------|-------------|------------|-------------------------|
| Frame shift | Gh_D08G2531 | 2          | 1029_1030insA           |
| Frame shift | Gh_D08G2593 | 4          | 595_596insT             |
| Frame shift | Gh_D09G0030 | 3          | 471delA                 |
| Frame shift | Gh_D09G0152 | 1          | 1delA                   |
| Frame shift | Gh_D09G0162 | 2          | 688_689insTGACATG       |
| Frame shift | Gh_D09G0173 | 1          | 1201_1202insG           |
| Frame shift | Gh_D09G0176 | 1          | 2357_2370del            |
| Frame shift | Gh_D09G0217 | 1          | 1526_1527del            |
| Frame shift | Gh_D09G0219 | 1          | 385delA                 |
| Frame shift | Gh_D09G0255 | 2          | 380_381del              |
| Frame shift | Gh_D09G0311 | 2          | 1029delT                |
| Frame shift | Gh_D09G0354 | 3          | 360delG                 |
| Frame shift | Gh_D09G0362 | 1          | 80_81insT               |
| Frame shift | Gh_D09G0365 | 1          | 202_203del              |
| Frame shift | Gh_D09G0601 | 12         | 1187_1188insT           |
| Frame shift | Gh_D09G0650 | 1          | 245_246insA             |
| Frame shift | Gh_D09G0757 | 2          | 92_93del                |
| Frame shift | Gh_D09G0826 | 1          | 122_123insTC            |
| Frame shift | Gh_D09G0829 | 1          | 1_2insAA                |
| Frame shift | Gh_D09G1027 | 5          | 756_757insATCT          |
| Frame shift | Gh_D09G1067 | 1          | 240_241insG             |
| Frame shift | Gh_D09G1124 | 2          | 2544delC                |
| Frame shift | Gh_D09G1239 | 1          | 169delC                 |
| Frame shift | Gh_D09G1369 | Whole gene |                         |
| Frame shift | Gh_D09G1373 | 10         | 2443delA                |
| Frame shift | Gh_D09G1373 | 10         | 2478_2479insA           |
| Frame shift | Gh_D09G1386 | 4          | 778delA                 |
| Frame shift | Gh_D09G1418 | 1          | 195_237del              |
| Frame shift | Gh_D09G1440 | 2          | 1444delC                |
| Frame shift | Gh_D09G1455 | 1          | 208delA                 |
| Frame shift | Gh_D09G1637 | 1          | 143delT                 |
| Frame shift | Gh_D09G1830 | 1          | 5delG                   |
| Frame shift | Gh_D09G1843 | 2          | 1012_1013insT           |
| Frame shift | Gh_D09G1852 | 2          | 451delG                 |
| Frame shift | Gh_D09G1876 | 2          | 1252_1253del            |
| Frame shift | Gh_D09G1913 | 2          | 630_631insA             |
| Frame shift | Gh_D09G1962 | 12         | 1798_1799insC           |
| Frame shift | Gh_D09G2136 | 1          | 562delG                 |
| Frame shift | Gh_D09G2306 | 1          | 39delC                  |
| Frame shift | Gh_D09G2356 | 2          | 469_470insT             |
| Frame shift | Gh_D09G2408 | 2          | 382_392CCCCCCCCCCCCCTT, |
| Frame shift | Gh_D09G2454 | 1          | 927_928insT             |
| Frame shift | Gh_D10G0004 | 1          | 18_19insACTTC           |
| Frame shift | Gh_D10G0126 | 16         | 3423delC                |
| Frame shift | Gh_D10G0256 | 2          | 87_88insC               |
| Frame shift | Gh_D10G0267 | 5          | 516delG                 |
| Frame shift | Gh_D10G0376 | 3          | 361_373del              |
| Frame shift | Gh_D10G0476 | 5          | 1092_1092del            |



|             |             |    |                          |
|-------------|-------------|----|--------------------------|
| Frame shift | Gh_D10G0620 | 2  | 1150_1151insAT           |
| Frame shift | Gh_D10G0635 | 1  | 1131delA                 |
| Frame shift | Gh_D10G0657 | 2  | 199_200del               |
| Frame shift | Gh_D10G0829 | 13 | 1309delC                 |
| Frame shift | Gh_D10G0832 | 5  | 1170_1171insTT           |
| Frame shift | Gh_D10G1014 | 2  | 676delG                  |
| Frame shift | Gh_D10G1088 | 1  | 37_43del                 |
| Frame shift | Gh_D10G1125 | 1  | 225_226insCG             |
| Frame shift | Gh_D10G1194 | 3  | 526_527del               |
| Frame shift | Gh_D10G1265 | 1  | 10_11insCCCC             |
| Frame shift | Gh_D10G1337 | 2  | 619_620del               |
| Frame shift | Gh_D10G1407 | 2  | 229_230insT              |
| Frame shift | Gh_D10G1911 | 1  | 264_265insC              |
| Frame shift | Gh_D10G1941 | 1  | 1423_1424insG            |
| Frame shift | Gh_D10G1941 | 1  | 33delC                   |
| Frame shift | Gh_D10G1943 | 2  | 2153_2154del             |
| Frame shift | Gh_D10G1951 | 1  | 189_190del               |
| Frame shift | Gh_D10G1957 | 1  | 1722_1723insTTGA         |
| Frame shift | Gh_D10G2036 | 1  | 143_153del               |
| Frame shift | Gh_D10G2093 | 1  | 1_2insA                  |
| Frame shift | Gh_D10G2127 | 2  | 350_353del               |
| Frame shift | Gh_D10G2142 | 1  | 153delG                  |
| Frame shift | Gh_D10G2208 | 1  | 184_185insA              |
| Frame shift | Gh_D10G2232 | 3  | 2590delC                 |
| Frame shift | Gh_D10G2250 | 1  | 1_2insAA                 |
| Frame shift | Gh_D10G2254 | 9  | 719_720insCAAA           |
| Frame shift | Gh_D10G2263 | 1  | 86delA                   |
| Frame shift | Gh_D10G2278 | 1  | 801delA                  |
| Frame shift | Gh_D10G2281 | 6  | 4709delT                 |
| Frame shift | Gh_D10G2281 | 8  | 5839_5840del             |
| Frame shift | Gh_D10G2317 | 3  | 794_804del               |
| Frame shift | Gh_D10G2333 | 3  | 949_950insG              |
| Frame shift | Gh_D10G2352 | 6  | 2351_2352insT            |
| Frame shift | Gh_D10G2371 | 3  | 263_264insG              |
| Frame shift | Gh_D10G2446 | 6  | 1246_1247insC            |
| Frame shift | Gh_D10G2525 | 4  | 1827delA                 |
| Frame shift | Gh_D10G2532 | 7  | 1310_1311insAACA         |
| Frame shift | Gh_D10G2573 | 7  | 1302_1303insG            |
| Frame shift | Gh_D10G2587 | 1  | 374_375insCAAGACATTTGGGG |
| Frame shift | Gh_D10G2591 | 1  | 307delG                  |
| Frame shift | Gh_D10G2628 | 1  | 387_388insT              |
| Frame shift | Gh_D11G0005 | 4  | 836_837insA              |
| Frame shift | Gh_D11G0128 | 2  | 2415_2416insA            |
| Frame shift | Gh_D11G0207 | 1  | 221_222insC              |
| Frame shift | Gh_D11G0210 | 6  | 501_504del               |
| Frame shift | Gh_D11G0271 | 9  | 1533_1537del             |
| Frame shift | Gh_D11G0272 | 6  | 722delA                  |
| Frame shift | Gh_D11G0309 | 3  | 676delG                  |

|             |             |    |                      |
|-------------|-------------|----|----------------------|
| Frame shift | Gh_D11G0406 | 4  | 1914delA             |
| Frame shift | Gh_D11G0414 | 9  | 1236_1239del         |
| Frame shift | Gh_D11G0434 | 2  | 439_461del           |
| Frame shift | Gh_D11G0540 | 1  | 341delT              |
| Frame shift | Gh_D11G0648 | 2  | 159delA              |
| Frame shift | Gh_D11G0698 | 2  | 218delA              |
| Frame shift | Gh_D11G0706 | 4  | 1400_1401insA        |
| Frame shift | Gh_D11G0733 | 4  | 554delT              |
| Frame shift | Gh_D11G0776 | 5  | 805_806insG          |
| Frame shift | Gh_D11G0783 | 2  | 324_325del           |
| Frame shift | Gh_D11G0799 | 1  | 748delC              |
| Frame shift | Gh_D11G0854 | 2  | 421_422insAT         |
| Frame shift | Gh_D11G0857 | 1  | 12delA               |
| Frame shift | Gh_D11G0859 | 2  | 43delA               |
| Frame shift | Gh_D11G0865 | 1  | 673delA              |
| Frame shift | Gh_D11G0903 | 1  | 62_63insA            |
| Frame shift | Gh_D11G0903 | 4  | 1485_1501del         |
| Frame shift | Gh_D11G0931 | 1  | 118_119insA          |
| Frame shift | Gh_D11G0968 | 10 | 3084delC             |
| Frame shift | Gh_D11G0982 | 1  | 44_45insA            |
| Frame shift | Gh_D11G0982 | 14 | 1844_1845insG        |
| Frame shift | Gh_D11G1004 | 8  | 1026_1027insA        |
| Frame shift | Gh_D11G1021 | 1  | 1275_1276del         |
| Frame shift | Gh_D11G1084 | 16 | 3226_3227del         |
| Frame shift | Gh_D11G1119 | 7  | 1600_1603del         |
| Frame shift | Gh_D11G1119 | 7  | 1066_1067del         |
| Frame shift | Gh_D11G1127 | 1  | 231_232insG          |
| Frame shift | Gh_D11G1135 | 1  | 757delA              |
| Frame shift | Gh_D11G1193 | 2  | 137_138del           |
| Frame shift | Gh_D11G1227 | 4  | 534_535insA          |
| Frame shift | Gh_D11G1296 | 3  | 216_217del           |
| Frame shift | Gh_D11G1513 | 2  | 146_150del           |
| Frame shift | Gh_D11G1514 | 3  | 217_218insAA         |
| Frame shift | Gh_D11G1602 | 1  | 1_2insA              |
| Frame shift | Gh_D11G1609 | 1  | 272_284del           |
| Frame shift | Gh_D11G1646 | 1  | 119_120insCCCTATTCCC |
| Frame shift | Gh_D11G1676 | 1  | 183_184del           |
| Frame shift | Gh_D11G1812 | 17 | 1820_1821del         |
| Frame shift | Gh_D11G1855 | 1  | 147_148insCCCC       |
| Frame shift | Gh_D11G1950 | 1  | 1050_1051insG        |
| Frame shift | Gh_D11G2091 | 12 | 1671delA             |
| Frame shift | Gh_D11G2095 | 1  | 155_156insT          |
| Frame shift | Gh_D11G2137 | 5  | 547delG              |
| Frame shift | Gh_D11G2146 | 2  | 707_708insAT         |
| Frame shift | Gh_D11G2452 | 3  | 376delC              |
| Frame shift | Gh_D11G2558 | 1  | 65delC               |
| Frame shift | Gh_D11G2589 | 6  | 529delA              |
| Frame shift | Gh_D11G2672 | 5  | 4847_4848del         |

|             |             |    |                |
|-------------|-------------|----|----------------|
| Frame shift | Gh_D11G2741 | 2  | 76delG         |
| Frame shift | Gh_D11G2741 | 2  | 114delA        |
| Frame shift | Gh_D11G2763 | 1  | 98delA         |
| Frame shift | Gh_D11G2918 | 1  | 47delT         |
| Frame shift | Gh_D11G2941 | 1  | 867_868insGCTA |
| Frame shift | Gh_D11G2950 | 2  | 2590_2593del   |
| Frame shift | Gh_D11G2959 | 1  | 216_229del     |
| Frame shift | Gh_D11G2964 | 2  | 1158_1162del   |
| Frame shift | Gh_D11G3006 | 6  | 747_748insA    |
| Frame shift | Gh_D11G3069 | 1  | 188_189insA    |
| Frame shift | Gh_D11G3107 | 14 | 11084delT      |
| Frame shift | Gh_D11G3108 | 13 | 8121_8122insT  |
| Frame shift | Gh_D11G3113 | 2  | 2639_2646del   |
| Frame shift | Gh_D11G3113 | 6  | 3450_3451insA  |
| Frame shift | Gh_D11G3115 | 2  | 855delC        |
| Frame shift | Gh_D11G3117 | 2  | 83_84insA      |
| Frame shift | Gh_D11G3234 | 12 | 1998_2007del   |
| Frame shift | Gh_D11G3237 | 5  | 1026_1027insA  |
| Frame shift | Gh_D11G3320 | 2  | 966_969del     |
| Frame shift | Gh_D11G3398 | 1  | 488_489del     |
| Frame shift | Gh_D11G3402 | 6  | 1155_1156insT  |
| Frame shift | Gh_D11G3413 | 2  | 373delG        |
| Frame shift | Gh_D11G3529 | 1  | 300_309del     |
| Frame shift | Gh_D12G0100 | 1  | 1_2insA        |
| Frame shift | Gh_D12G0117 | 2  | 419delA        |
| Frame shift | Gh_D12G0136 | 1  | 42_43insCCCCT  |
| Frame shift | Gh_D12G0420 | 15 | 1694delC       |
| Frame shift | Gh_D12G0424 | 1  | 115delA        |
| Frame shift | Gh_D12G0528 | 1  | 185_186insT    |
| Frame shift | Gh_D12G0545 | 4  | 163_164del     |
| Frame shift | Gh_D12G0571 | 2  | 823_824insA    |
| Frame shift | Gh_D12G0575 | 3  | 398_402del     |
| Frame shift | Gh_D12G0926 | 2  | 500_501insA    |
| Frame shift | Gh_D12G0952 | 4  | 415_418del     |
| Frame shift | Gh_D12G1086 | 1  | 724_730del     |
| Frame shift | Gh_D12G1301 | 1  | 24_25insACAAC  |
| Frame shift | Gh_D12G1344 | 1  | 83delG         |
| Frame shift | Gh_D12G1367 | 2  | 1777_1778insA  |
| Frame shift | Gh_D12G1403 | 5  | 392_393insT    |
| Frame shift | Gh_D12G1455 | 1  | 3_6del         |
| Frame shift | Gh_D12G1458 | 10 | 1526delC       |
| Frame shift | Gh_D12G1476 | 3  | 831_832insT    |
| Frame shift | Gh_D12G1685 | 2  | 549delG        |
| Frame shift | Gh_D12G1726 | 4  | 278_281del     |
| Frame shift | Gh_D12G1821 | 1  | 214delG        |
| Frame shift | Gh_D12G1837 | 2  | 1112_1113insG  |
| Frame shift | Gh_D12G1840 | 1  | 11delA         |
| Frame shift | Gh_D12G1898 | 7  | 1123_1124insAA |

|             |             |            |                 |
|-------------|-------------|------------|-----------------|
| Frame shift | Gh_D12G2020 | 7          | 713_714insTT    |
| Frame shift | Gh_D12G2023 | 2          | 1750_1751insG   |
| Frame shift | Gh_D12G2062 | 1          | 162_165del      |
| Frame shift | Gh_D12G2062 | 2          | 363_364insT     |
| Frame shift | Gh_D12G2137 | 17         | 1421delT        |
| Frame shift | Gh_D12G2528 | 1          | 210delT         |
| Frame shift | Gh_D12G2652 | 2          | 417_421del      |
| Frame shift | Gh_D12G2664 | 5          | 504delA         |
| Frame shift | Gh_D12G2670 | 1          | 1_2insA         |
| Frame shift | Gh_D12G2780 | 2          | 745_746insTTATT |
| Frame shift | Gh_D13G0084 | 2          | 460_461insCTTA  |
| Frame shift | Gh_D13G0085 | 1          | 78_79insC       |
| Frame shift | Gh_D13G0085 | 2          | 189_196del      |
| Frame shift | Gh_D13G0085 | 3          | 314delG         |
| Frame shift | Gh_D13G0085 | 5          | 653_654insA     |
| Frame shift | Gh_D13G0085 | 7          | 808_809insC     |
| Frame shift | Gh_D13G0088 | 6          | 473delT         |
| Frame shift | Gh_D13G0104 | 3          | 550_551insAG    |
| Frame shift | Gh_D13G0133 | 11         | 1422delT        |
| Frame shift | Gh_D13G0134 | 11         | 1785_1786insT   |
| Frame shift | Gh_D13G0134 | 2          | 399_400insA     |
| Frame shift | Gh_D13G0134 | 7          | 1244_1245insA   |
| Frame shift | Gh_D13G0239 | 1          | 405delG         |
| Frame shift | Gh_D13G0520 | 1          | 1_2insA         |
| Frame shift | Gh_D13G0543 | 2          | 329_332del      |
| Frame shift | Gh_D13G0544 | 2          | 1781_1782insG   |
| Frame shift | Gh_D13G0572 | 1          | 131_134del      |
| Frame shift | Gh_D13G0607 | 2          | 896_897insT     |
| Frame shift | Gh_D13G0659 | 2          | 338_339insT     |
| Frame shift | Gh_D13G0669 | 1          | 103delA         |
| Frame shift | Gh_D13G0691 | 3          | 126_133del      |
| Frame shift | Gh_D13G0729 | 2          | 90delA          |
| Frame shift | Gh_D13G0769 | Whole gene |                 |
| Frame shift | Gh_D13G0842 | 2          | 234delT         |
| Frame shift | Gh_D13G0864 | 1          | 1_2insA         |
| Frame shift | Gh_D13G0879 | 2          | 135delG         |
| Frame shift | Gh_D13G0951 | 3          | 387_388insA     |
| Frame shift | Gh_D13G1122 | 2          | 692delG         |
| Frame shift | Gh_D13G1226 | 4          | 341delG         |
| Frame shift | Gh_D13G1226 | 4          | 421_422insAGGTA |
| Frame shift | Gh_D13G1272 | 1          | 1_2insAAAA      |
| Frame shift | Gh_D13G1300 | 2          | 356_359del      |
| Frame shift | Gh_D13G1335 | 11         | 826delC         |
| Frame shift | Gh_D13G1373 | 12         | 1483delA        |
| Frame shift | Gh_D13G1425 | 7          | 858delG         |
| Frame shift | Gh_D13G1455 | 6          | 1348delG        |
| Frame shift | Gh_D13G1460 | 3          | 594_595insC     |
| Frame shift | Gh_D13G1570 | 1          | 1619_1620insA   |

|             |                 |            |                          |
|-------------|-----------------|------------|--------------------------|
| Frame shift | Gh_D13G1660     | 1          | 237_238del               |
| Frame shift | Gh_D13G1727     | 10         | 842delG                  |
| Frame shift | Gh_D13G1743     | 1          | 1065_1066insT            |
| Frame shift | Gh_D13G1743     | 1          | 799_811del               |
| Frame shift | Gh_D13G1743     | 1          | 64_65insGGATGCTTTCACC    |
| Frame shift | Gh_D13G1891     | 2          | 235delG                  |
| Frame shift | Gh_D13G1980     | 1          | 161_162insA              |
| Frame shift | Gh_D13G2124     | 3          | 803delC                  |
| Frame shift | Gh_D13G2126     | 1          | 1_2insA                  |
| Frame shift | Gh_D13G2159     | 1          | 146_156del               |
| Frame shift | Gh_D13G2162     | 1          | 338_339insTACTC          |
| Frame shift | Gh_D13G2185     | 26         | 2825_2826del             |
| Frame shift | Gh_D13G2209     | 1          | 356_357insC              |
| Frame shift | Gh_D13G2291     | 1          | 266delC                  |
| Frame shift | Gh_D13G2319     | 1          | 36delG                   |
| Frame shift | Gh_D13G2322     | 11         | 1687_1715del             |
| Frame shift | Gh_D13G2352     | 2          | 300_306del               |
| Frame shift | Gh_D13G2380     | 4          | 709_727del               |
| Frame shift | Gh_D13G2480     | 2          | 2515_2516insC            |
| Frame shift | Gh_D13G2494     | 1          | 37_38insCCCGCCGTTACAA    |
| Frame shift | Gh_D13G2507     | 1          | 926_927insGGTGGTGGAT     |
| Frame shift | Gh_D13G2527     | 9          | 1905_1906insA            |
| Frame shift | Gh_Sca004802G01 | 6          | 1247delA                 |
| Frame shift | Gh_Sca004822G02 | 1          | 356_357insC              |
| Frame shift | Gh_Sca004831G03 | 8          | 1322delA                 |
| Frame shift | Gh_Sca004865G01 | 1          | 154delC                  |
| Frame shift | Gh_Sca004871G05 | 1          | 480_481insCCCAAACCCCAACC |
| Frame shift | Gh_Sca004909G04 | Whole gene |                          |
| Frame shift | Gh_Sca004925G03 | 2          | 776delT                  |
| Frame shift | Gh_Sca004952G01 | 2          | 232_232GGTTTTTTTA,       |
| Frame shift | Gh_Sca004965G03 | 5          | 3060_3061del             |
| Frame shift | Gh_Sca004965G03 | 8          | 4403delT                 |
| Frame shift | Gh_Sca005047G02 | 3          | 211_212insGTTGCAA        |
| Frame shift | Gh_Sca005111G02 | 2          | 92delA                   |
| Frame shift | Gh_Sca005161G01 | Whole gene |                          |
| Frame shift | Gh_Sca005232G02 | 1          | 206_207insT              |
| Frame shift | Gh_Sca005718G01 | 11         | 1924_1925del             |
| Frame shift | Gh_Sca005755G01 | 4          | 2626delG                 |
| Frame shift | Gh_Sca007061G01 | 2          | 1835_1836insT            |
| Frame shift | Gh_Sca008811G01 | 2          | 319delG                  |
| Frame shift | Gh_Sca011476G01 | 1          | 365_405del               |
| Frame shift | Gh_Sca013434G01 | 7          | 1016_1017insAG           |
| Frame shift | Gh_Sca013939G01 | 3          | 412_419del               |
| Frame shift | Gh_Sca014641G01 | 4          | 226_227insTGGTTGTTGG     |
| Frame shift | Gh_Sca014817G01 | 1          | 302delA                  |
| Frame shift | Gh_Sca026213G01 | 1          | 476delC                  |
| Frame shift | Gh_Sca033921G01 | 2          | 298delG                  |
| Frame shift | Gh_Sca109475G01 | 1          | 243delA                  |

|           |             |    |                                                  |
|-----------|-------------|----|--------------------------------------------------|
| Stop gain | Gh_A01G0632 | 1  | 12_13insGAATGATGAATGAT                           |
| Stop gain | Gh_A01G1900 | 6  | 481_482insGAATCTTATCATGTCAGGTTGCTGAAGATTCT<br>T  |
| Stop gain | Gh_A02G1530 | 1  | 1439delC                                         |
| Stop gain | Gh_A03G0076 | 3  | 1126_1127insGGAAACTACCTGGGTGATT                  |
| Stop gain | Gh_A05G0640 | 1  | 1delA                                            |
| Stop gain | Gh_A05G0960 | 1  | 36_37insTGTCTCTAGAAGGCTATGAT                     |
| Stop gain | Gh_A06G0490 | 4  | 185delG                                          |
| Stop gain | Gh_A06G1102 | 2  | 506_507insCTTTAGCGGCGTCTTATAAA                   |
| Stop gain | Gh_A07G1322 | 4  | 1381delA                                         |
| Stop gain | Gh_A07G1353 | 1  | 233delG                                          |
| Stop gain | Gh_A07G1976 | 3  | 721_722insCTCACTA                                |
| Stop gain | Gh_A08G0640 | 2  | 690_691insAGGAGTTG                               |
| Stop gain | Gh_A09G1205 | 7  | 2191delC                                         |
| Stop gain | Gh_A10G1445 | 1  | 94delA                                           |
| Stop gain | Gh_A11G0202 | 7  | 1873_1874insAA                                   |
| Stop gain | Gh_A11G0899 | 1  | 556delC                                          |
| Stop gain | Gh_A11G1360 | 1  | 1delA                                            |
| Stop gain | Gh_A11G1363 | 2  | 347_348insAGACTTAAACCAGACTTCATAGACTTCAT          |
| Stop gain | Gh_A12G0388 | 1  | 406delA                                          |
| Stop gain | Gh_A12G0922 | 7  | 2218_2219insA                                    |
| Stop gain | Gh_A12G2081 | 7  | 1166delT                                         |
| Stop gain | Gh_A12G2593 | 1  | 1delA                                            |
| Stop gain | Gh_A13G1536 | 6  | 1287_1288insGGATAAGATCCAGCAGTTTCCGCCAGAGGC<br>AC |
| Stop gain | Gh_A13G1677 | 19 | 2659_2660insCATAAT                               |
| Stop gain | Gh_D02G0149 | 2  | 1097_1098insTGCATAG                              |
| Stop gain | Gh_D02G0581 | 1  | 190delA                                          |
| Stop gain | Gh_D03G1096 | 1  | 32_33insCAATTAGACCAGT                            |
| Stop gain | Gh_D04G0016 | 1  | 27_28insT                                        |
| Stop gain | Gh_D04G0244 | 1  | 394_395insCTTCCTCCATATAATTCAAGT                  |
| Stop gain | Gh_D06G0630 | 1  | 1delA                                            |
| Stop gain | Gh_D06G0711 | 9  | 2043_2044insTTCTAGGG                             |
| Stop gain | Gh_D06G1233 | 10 | 3546_3547insTACAGCAGCTAGGCTGCCATATTTTGATGG<br>T  |
| Stop gain | Gh_D06G1676 | 3  | 474_475insTAGAACAGCATCA                          |
| Stop gain | Gh_D07G0776 | 2  | 1346delT                                         |
| Stop gain | Gh_D07G1810 | 3  | 1066_1067insA                                    |
| Stop gain | Gh_D08G0879 | 3  | 269_270insTCATTGCTAAGAA                          |
| Stop gain | Gh_D10G0439 | 2  | 721delT                                          |
| Stop gain | Gh_D10G0617 | 1  | 143delT                                          |
| Stop gain | Gh_D11G0610 | 1  | 423_424insTGATGGTAAGTGATGGA                      |
| Stop gain | Gh_D11G0839 | 1  | 26_27insG                                        |
| Stop gain | Gh_D11G1034 | 2  | 146_147insGTTTTTTA                               |
| Stop gain | Gh_D11G3133 | 1  | 227_228insGCTGCAGTAA                             |
| Stop gain | Gh_D12G0713 | 3  | 1248_1249insTGA                                  |
| Stop gain | Gh_D13G0478 | 2  | 808delA                                          |
| Stop gain | Gh_D13G1679 | 2  | 229_230insAAATCCACTCCTTTATT                      |
| Stop gain | Gh_D13G1710 | 1  | 269_270insAGAAACTTAAA                            |

|           |                 |    |                 |
|-----------|-----------------|----|-----------------|
| Stop loss | Gh_A01G1372     | 2  | 556delT         |
| Stop loss | Gh_A06G0080     | 17 | 1782delA        |
| Stop loss | Gh_A07G0204     | 9  | 887delA         |
| Stop loss | Gh_A11G1007     | 3  | 765_766insA     |
| Stop loss | Gh_A11G1683     | 5  | 1302delA        |
| Stop loss | Gh_D01G1775     | 1  | 1037delA        |
| Stop loss | Gh_D02G0127     | 14 | 3509delA        |
| Stop loss | Gh_D02G0166     | 1  | 1376delA        |
| Stop loss | Gh_D06G1100     | 1  | 485delA         |
| Stop loss | Gh_D07G2341     | 3  | 737delA         |
| Stop loss | Gh_D08G2060     | 4  | 903delG         |
| Stop loss | Gh_D11G3220     | 3  | 609delA         |
| Stop loss | Gh_D13G0343     | 1  | 586_587insTAAGT |
| Stop loss | Gh_Sca005714G01 | 22 | 5132_5133insC   |
