# Supplementary material for: Abundant Small Genetic Alterations after Upland Cotton Domestication
Source: Hindawi journal article supplement (doi:10.1155/2018/9254302), 2018-12-18
Supplement: f3 [file 9254302.f3.pdf]

TABLE S3: *Cis*-acting regulatory element variations in the upstream and downstream 2-kb regions of five genes between the cultivated and wild cottons

| No                                                  | Region     | Chr | Location | SNP/Indel |        | Cis- element | Function                                                           | Cis- element | Function                                                           |
|-----------------------------------------------------|------------|-----|----------|-----------|--------|--------------|--------------------------------------------------------------------|--------------|--------------------------------------------------------------------|
|                                                     |            |     |          | TM1       | Tx2094 |              |                                                                    | TM1          | Tx2094                                                             |
| Glycerol-3-phosphate acyltransferase 3: Gh_A06G0327 |            |     |          |           |        |              |                                                                    |              |                                                                    |
| 1                                                   | Upstream   | A06 | 4926006  | A         | G      |              |                                                                    | CAAT-box     | Common <i>cis</i> -acting element in promoter and enhancer regions |
| 2                                                   | Upstream   | A06 | 4926062  | T         | C      |              |                                                                    |              |                                                                    |
| 3                                                   | Upstream   | A06 | 4926534  | C         | T      | CAAT-box     | Common <i>cis</i> -acting element in promoter and enhancer regions | CAAT-box     | Common <i>cis</i> -acting element in promoter and enhancer regions |
| 1                                                   | Upstream   | A06 | 4925722  | -         | AGCAA  |              |                                                                    |              |                                                                    |
| 2                                                   | Upstream   | A06 | 4926440  | -         | A      | TATA-box     | Core promoter element around -30 of transcription start            | TATA-box     | Core promoter element around -30 of transcription start            |
| 3                                                   | Upstream   | A06 | 4927020  | A         | -      |              |                                                                    |              |                                                                    |
| 4                                                   | Downstream | A06 | 4929938  | CA        | -      | P-box        | Gibberellin-responsive element                                     |              |                                                                    |
| 5                                                   | Downstream | A06 | 4930395  | -         | A      |              |                                                                    | AAGAA-motif  | Found in <i>Avena sativa</i> , unknown                             |
| 6                                                   | Downstream | A06 | 4931274  | T         | -      | TATA-box     | Core promoter element around -30 of transcription start            |              |                                                                    |
| 7                                                   | Downstream | A06 | 4931460  | -         | AT     | CAAT-box     | Common <i>cis</i> -acting element in promoter and enhancer regions | CAAT-box     | Common <i>cis</i> -acting element in promoter and enhancer regions |
| Glycerol-3-phosphate acyltransferase 3: Gh_D06G0354 |            |     |          |           |        |              |                                                                    |              |                                                                    |
| 1                                                   | Upstream   | D06 | 4860490  | A         | T      |              |                                                                    | CAAT-box     | Common <i>cis</i> -acting element in promoter and enhancer regions |
| 2                                                   | Upstream   | D06 | 4860520  | C         | G      |              |                                                                    |              |                                                                    |
| 3                                                   | Upstream   | D06 | 4860787  | C         | A      |              |                                                                    |              |                                                                    |
| 4                                                   | Upstream   | D06 | 4860863  | G         | T      | CAAT-box     | Common <i>cis</i> -acting element in promoter and enhancer regions |              |                                                                    |
| 5                                                   | Upstream   | D06 | 4861360  | A         | G      |              |                                                                    |              |                                                                    |
| 6                                                   | Upstream   | D06 | 4861628  | C         | G      |              |                                                                    |              |                                                                    |
| 7                                                   | Upstream   | D06 | 4861714  | T         | C      |              |                                                                    |              |                                                                    |
| 8                                                   | Upstream   | D06 | 4861835  | G         | A      |              |                                                                    |              |                                                                    |

|    |            |     |         |   |   |          |                                                                    |          |                                                         |
|----|------------|-----|---------|---|---|----------|--------------------------------------------------------------------|----------|---------------------------------------------------------|
| 9  | Upstream   | D06 | 4861851 | A | G | CAAT-box | Common <i>cis</i> -acting element in promoter and enhancer regions |          |                                                         |
| 10 | Downstream | D06 | 4864979 | A | G |          |                                                                    |          |                                                         |
| 11 | Downstream | D06 | 4865113 | A | G | TATA-box | Core promoter element around -30 of transcription start            |          |                                                         |
| 12 | Downstream | D06 | 4865117 | T | A | TATA-box | Core promoter element around -30 of transcription start            |          |                                                         |
| 1  | Downstream | D06 | 4861080 | - | T | TATA-box | Core promoter element around -30 of transcription start            | TATA-box | Core promoter element around -30 of transcription start |
| 2  | Downstream | D06 | 4861126 | - | T | TATA-box | Core promoter element around -30 of transcription start            | TATA-box | Core promoter element around -30 of transcription start |
| 3  | Downstream | D06 | 4861222 | A | - |          |                                                                    |          |                                                         |
| 4  | Upstream   | D06 | 4861486 | A | - | TATA-box | Core promoter element around -30 of transcription start            | TATA-box | Core promoter element around -30 of transcription start |

#### O-methyltransferase 1: Gh\_A12G1059

|   |          |     |          |   |   |             |                                                                           |           |                                                                    |
|---|----------|-----|----------|---|---|-------------|---------------------------------------------------------------------------|-----------|--------------------------------------------------------------------|
| 1 | Upstream | A12 | 62933035 | T | C | TATA-box    | Core promoter element around -30 of transcription start                   |           |                                                                    |
| 2 | Upstream | A12 | 62933400 | T | C |             |                                                                           | Unnamed_4 | found in <i>Petroselinum hortense</i> , unknown                    |
| 3 | Upstream | A12 | 62933441 | C | T | CGTCA-motif | <i>Cis</i> -acting regulatory element involved in the MeJA-responsiveness | CAAT-box  | Common <i>cis</i> -acting element in promoter and enhancer regions |
| 4 | Upstream | A12 | 62933562 | A | G |             |                                                                           |           |                                                                    |
| 5 | Upstream | A12 | 62933571 | A | G | CAAT-box    | Common <i>cis</i> -acting element in promoter and enhancer regions        |           |                                                                    |
| 6 | Upstream | A12 | 62934066 | C | T |             |                                                                           | CAAT-box  | Common <i>cis</i> -acting element in promoter and enhancer regions |
| 7 | Upstream | A12 | 62934534 | A | G |             |                                                                           |           |                                                                    |

#### O-methyltransferase 1: Gh\_D12G1183

|   |          |     |          |   |   |  |  |           |                          |
|---|----------|-----|----------|---|---|--|--|-----------|--------------------------|
| 1 | Upstream | D12 | 39228033 | C | G |  |  | GT1-motif | Light responsive element |
| 2 | Upstream | D12 | 39228034 | G | T |  |  |           |                          |
| 3 | Upstream | D12 | 39228864 | C | T |  |  | Sp1       | Light responsive element |

|   |            |     |          |     |   |          |                                                                    |  |  |
|---|------------|-----|----------|-----|---|----------|--------------------------------------------------------------------|--|--|
| 4 | Upstream   | D12 | 39229504 | A   | C | TATA-box | Core promoter element around -30 of transcription start            |  |  |
| 5 | Upstream   | D12 | 39229872 | A   | C | CAAT-box | Common <i>cis</i> -acting element in promoter and enhancer regions |  |  |
| 1 | Downstream | D12 | 39229174 | CTT | - |          |                                                                    |  |  |

#### Profilin 1: Gh\_A05G0193

|   |            |     |         |                    |    |                      |                                                                 |                |          |
|---|------------|-----|---------|--------------------|----|----------------------|-----------------------------------------------------------------|----------------|----------|
| 1 | Downstream | A05 | 2017536 | T                  | C  | AT-rich element      | Binding site of AT-rich DNA binding protein (ATBP-1)            |                |          |
| 1 | Downstream | A05 | 2017605 | TCTTTT             | -  | 5UTR Py-rich stretch | <i>Cis</i> -acting element conferring high transcription levels |                |          |
| 2 | Downstream | A05 | 2019245 | ACAGACT<br>ATAAAAA | -  | TATA-box             | Core promoter element around -30 of transcription start         |                |          |
| 3 | Upstream   | A05 | 2022130 | -                  | TA |                      |                                                                 | TA-rich region | Enhancer |

#### Profilin 1: Gh\_D05G0266

|    |            |     |         |   |   |             |                                                                         |          |                                                                    |
|----|------------|-----|---------|---|---|-------------|-------------------------------------------------------------------------|----------|--------------------------------------------------------------------|
| 1  | Downstream | D05 | 2387240 | A | G |             |                                                                         |          |                                                                    |
| 2  | Downstream | D05 | 2387438 | T | A |             |                                                                         | TATA-box | Core promoter element around -30 of transcription start            |
| 3  | Downstream | D05 | 2387681 | G | T |             |                                                                         |          |                                                                    |
| 4  | Downstream | D05 | 2388753 | C | T | Sp1         | Light responsive element                                                |          |                                                                    |
| 5  | Upstream   | D05 | 2389954 | G | C |             |                                                                         |          |                                                                    |
| 6  | Upstream   | D05 | 2390043 | T | A | Skn-1_motif | <i>Cis</i> -acting regulatory element required for endosperm expression | Box-W1   | Fungal elicitor responsive element                                 |
| 7  | Upstream   | D05 | 2390115 | T | A | CAAT-box    | Common <i>cis</i> -acting element in promoter and enhancer regions      | CAAT-box | Common <i>cis</i> -acting element in promoter and enhancer regions |
| 8  | Upstream   | D05 | 2390192 | A | T | TATA-box    | Core promoter element around -30 of transcription start                 | TATA-box | Core promoter element around -30 of transcription start            |
| 9  | Upstream   | D05 | 2390231 | G | A | CAAT-box    | Common <i>cis</i> -acting element in promoter and enhancer regions      | CAAT-box | Common <i>cis</i> -acting element in promoter and enhancer regions |
| 10 | Upstream   | D05 | 2390272 | C | A |             |                                                                         |          |                                                                    |
| 11 | Upstream   | D05 | 2390341 | G | A |             |                                                                         | TATA-box | Core promoter element around                                       |

|    |            |     |         |   |                                                     |          |                                                                     |                                                                    |
|----|------------|-----|---------|---|-----------------------------------------------------|----------|---------------------------------------------------------------------|--------------------------------------------------------------------|
|    |            |     |         |   |                                                     |          |                                                                     | -30 of transcription start                                         |
| 12 | Upstream   | D05 | 2390346 | G | T                                                   |          |                                                                     |                                                                    |
| 13 | Upstream   | D05 | 2390433 | G | A                                                   |          |                                                                     |                                                                    |
| 14 | Upstream   | D05 | 2390877 | G | T                                                   |          | TATA-box                                                            | Core promoter element around -30 of transcription start            |
| 15 | Upstream   | D05 | 2391219 | T | C                                                   | TATA-box | Core promoter element around -30 of transcription start             |                                                                    |
| 16 | Upstream   | D05 | 2391233 | T | G                                                   | ARE      | Cis-acting regulatory element essential for the anaerobic induction |                                                                    |
| 17 | Upstream   | D05 | 2391539 | C | T                                                   |          | TATA-box                                                            | Core promoter element around -30 of transcription start            |
| 18 | Upstream   | D05 | 2391585 | C | T                                                   |          |                                                                     |                                                                    |
| 19 | Upstream   | D05 | 2391587 | C | T                                                   |          |                                                                     | Common <i>cis</i> -acting element in promoter and enhancer regions |
| 20 | Upstream   | D05 | 2391603 | G | A                                                   |          |                                                                     |                                                                    |
| 21 | Upstream   | D05 | 2391627 | C | T                                                   |          | TATA-box                                                            | Core promoter element around -30 of transcription start            |
| 1  | Downstream | D05 | 2388235 | A | -                                                   |          |                                                                     |                                                                    |
| 2  | Upstream   | D05 | 2390458 | - | GTCGATT<br>TTAACAG<br>TCCAGTG<br>ACTTATC<br>ATAAAAT |          | +                                                                   | Core promoter element around -30 of transcription start            |
| 3  | Upstream   | D05 | 2390862 | - | T                                                   |          |                                                                     |                                                                    |
| 4  | Upstream   | D05 | 2390933 | C | -                                                   |          |                                                                     |                                                                    |
| 5  | Upstream   | D05 | 2391574 | - | TA                                                  |          | TATA-box                                                            | Core promoter element around -30 of transcription start            |

#### Aldehyde dehydrogenase 7: Gh\_D06G1578

|   |            |     |          |   |   |  |       |                                                        |
|---|------------|-----|----------|---|---|--|-------|--------------------------------------------------------|
| 1 | Downstream | D06 | 52815990 | G | A |  | Box I | Light responsive element                               |
| 2 | Downstream | D06 | 52816170 | A | C |  | LTR   | <i>Cis</i> -acting element involved in low-temperature |

|    |            |     |          |   |   |           |                                                                        |             |                                                                         |
|----|------------|-----|----------|---|---|-----------|------------------------------------------------------------------------|-------------|-------------------------------------------------------------------------|
| 3  | Downstream | D06 | 52816276 | G | A |           |                                                                        | TATA-box    | responsiveness<br>Core promoter element around -30                      |
| 4  | Downstream | D06 | 52816384 | C | T | CAAT-box  | Common <i>cis</i> -acting element in promoter and enhancer regions     |             |                                                                         |
| 5  | Downstream | D06 | 52816937 | C | T | CCAAT-box | MYBHv1 binding site                                                    |             |                                                                         |
| 6  | Downstream | D06 | 52817185 | T | A |           |                                                                        |             |                                                                         |
| 7  | Downstream | D06 | 52817444 | T | C |           |                                                                        |             |                                                                         |
| 8  | Upstream   | D06 | 52822990 | C | A |           |                                                                        |             |                                                                         |
| 9  | Upstream   | D06 | 52823767 | A | G | G-box     | <i>Cis</i> -acting regulatory element involved in light responsiveness |             |                                                                         |
| 10 | Upstream   | D06 | 52824126 | A | C |           |                                                                        | Skn-1_motif | <i>Cis</i> -acting regulatory element required for endosperm expression |
| 11 | Upstream   | D06 | 52824380 | G | T |           |                                                                        | CAAT-box    | Common <i>cis</i> -acting element in promoter and enhancer regions      |
| 12 | Upstream   | D06 | 52824602 | C | T | Box I     | Light responsive element                                               | TATA-box    | Core promoter element around -30 of transcription start                 |
|    |            |     |          |   |   | CAAT-box  | Common <i>cis</i> -acting element in promoter and enhancer regions     |             |                                                                         |
|    |            |     |          |   |   | ERE       | ethylene-responsive element                                            |             |                                                                         |
| 13 | Upstream   | D06 | 52824822 | G | A | Unnamed_4 | Found in <i>Petroselinum hortense</i> , unknown                        |             |                                                                         |
| 1  | Downstream | D06 | 52816087 | - | A |           |                                                                        |             |                                                                         |
| 2  | Downstream | D06 | 52816245 | A | - | TATA-box  | Core promoter element around -30 of transcription start                | TATA-box    | Core promoter element around -30 of transcription start                 |
| 3  | Downstream | D06 | 52816429 | - | A |           |                                                                        |             |                                                                         |
| 4  | Upstream   | D06 | 52823480 | - | T |           |                                                                        |             |                                                                         |
| 5  | Upstream   | D06 | 52824474 | T | - |           |                                                                        |             |                                                                         |

**Tyrosine transaminase family protein: Gh\_D13G1562**

|    |          |     |          |   |              |          |                                                         |          |                                                                    |
|----|----------|-----|----------|---|--------------|----------|---------------------------------------------------------|----------|--------------------------------------------------------------------|
| 1  | Upstream | D13 | 47977576 | A | G            |          |                                                         |          |                                                                    |
| 2  | Upstream | D13 | 47977578 | G | C            |          |                                                         |          |                                                                    |
| 3  | Upstream | D13 | 47978181 | C | T            | MBS      | MYB binding site involved in drought-inducibility       | CAAT-box | Common <i>cis</i> -acting element in promoter and enhancer regions |
| 4  | Upstream | D13 | 47984631 | T | G            | TATA-box | Core promoter element around -30 of transcription start |          |                                                                    |
| 5  | Upstream | D13 | 47984728 | G | T            |          |                                                         |          |                                                                    |
| 6  | Upstream | D13 | 47984764 | T | C            |          |                                                         |          |                                                                    |
| 7  | Upstream | D13 | 47984775 | C | T            |          |                                                         | CAAT-box | Common <i>cis</i> -acting element in promoter and enhancer regions |
| 8  | Upstream | D13 | 47984831 | C | T            |          |                                                         | CAAT-box | Common <i>cis</i> -acting element in promoter and enhancer regions |
| 9  | Upstream | D13 | 47984989 | A | C            |          |                                                         |          |                                                                    |
| 10 | Upstream | D13 | 47985123 | G | A            |          |                                                         | Box-W1   | Fungal elicitor responsive element                                 |
| 11 | Upstream | D13 | 47985145 | G | T            |          |                                                         | CAAT-box | Common <i>cis</i> -acting element in promoter and enhancer regions |
| 12 | Upstream | D13 | 47985688 | T | C            | TATA-box | Core promoter element around -30 of transcription start | CAAT-box | Common <i>cis</i> -acting element in promoter and enhancer regions |
| 13 | Upstream | D13 | 47985691 | T | C            | TATA-box | Core promoter element around -30 of transcription start |          |                                                                    |
| 1  | Upstream | D13 | 47984385 | - | T            | TATA-box | Core promoter element around -30 of transcription start | TATA-box | Core promoter element around -32 of transcription start            |
| 2  | Upstream | D13 | 47985548 | - | TTTATGA<br>T |          |                                                         | CAAT-box | Common <i>cis</i> -acting element in promoter and enhancer regions |
| 3  | Upstream | D13 | 47985628 | - | T            | TATA-box | Core promoter element around -30 of transcription start | TATA-box | Core promoter element around -30 of transcription start            |
| 4  | Upstream | D13 | 47986310 | - | A            |          |                                                         |          |                                                                    |

Blue color :changed *cis*-elements; Green color: unchanged *cis*-elements; Grey: no *cis*-element.
